# Supplementary material for: Copper-catalyzed peri-selective direct sulfenylation of 1-naphthylamines with disulfides
Source: Royal Society of Chemistry journal article supplement (doi:10.1039/c7qo01016h), 2018-01-01

# Supporting Information

## Copper-Catalyzed *peri*-Selective Direct Sulfenylation of 1-Naphthylamines with Disulfides

Yan-Shi Xiong,<sup>a</sup> Yang Yu,<sup>a</sup> Jiang Weng,<sup>a,\*</sup> and Gui Lu<sup>a,\*</sup>

<sup>a</sup> Institute of Medicinal Chemistry, School of Pharmaceutical Sciences, Sun Yat-sen University,  
Guangzhou 510006, People's Republic of China  
Fax: (+86)-20-3994-3048; E-mail: wengj2@mail.sysu.edu.cn or lugui@mail.sysu.edu.cn

### Table of Contents

Copies of <sup>1</sup>H, <sup>13</sup>C and <sup>19</sup>F NMR spectra of compounds.....S2

## Copies of NMR spectra of compounds

$^1\text{H}$  NMR of compound **3a** (in  $\text{CDCl}_3$ )

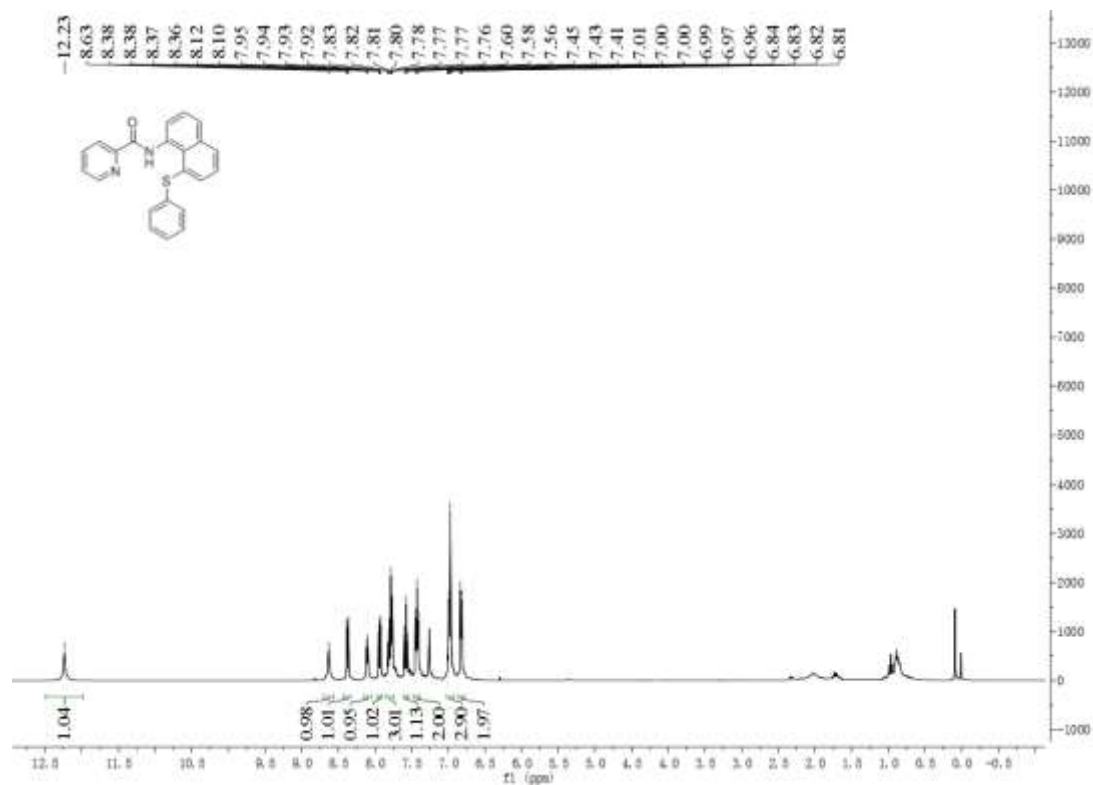

$^{13}\text{C}$  NMR of compound **3a** (in  $\text{CDCl}_3$ )

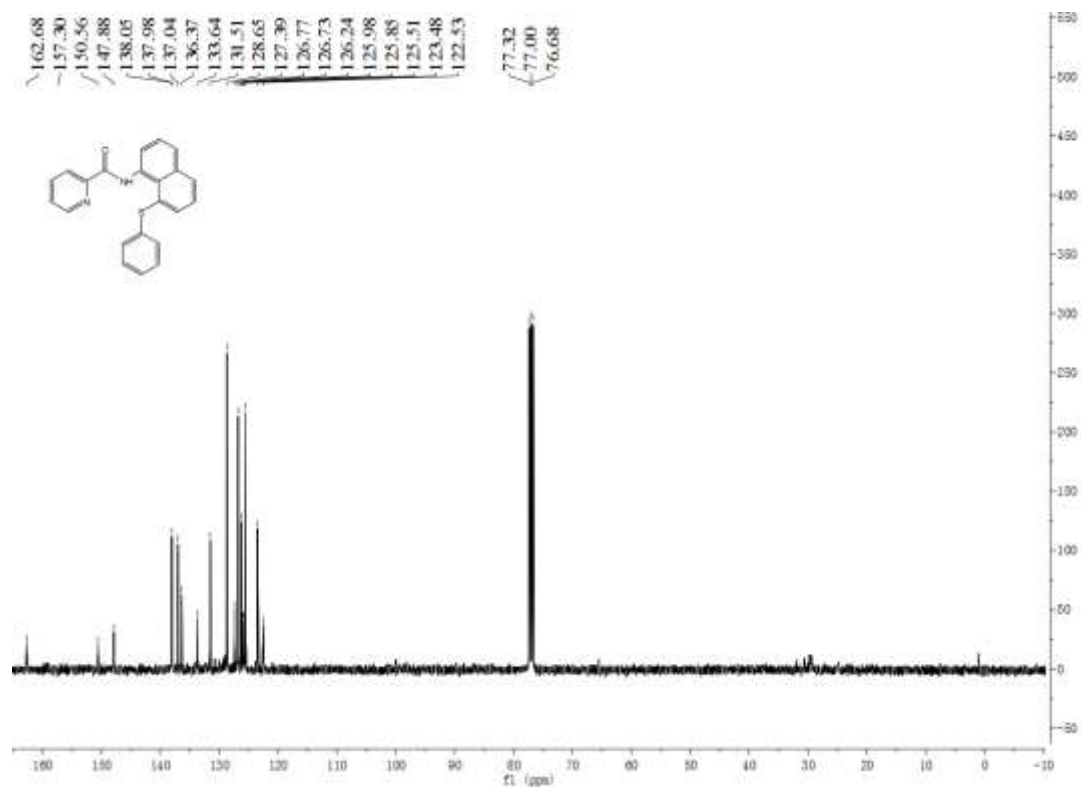

$^1\text{H}$  NMR of compound **3b** (in  $\text{CDCl}_3$ )

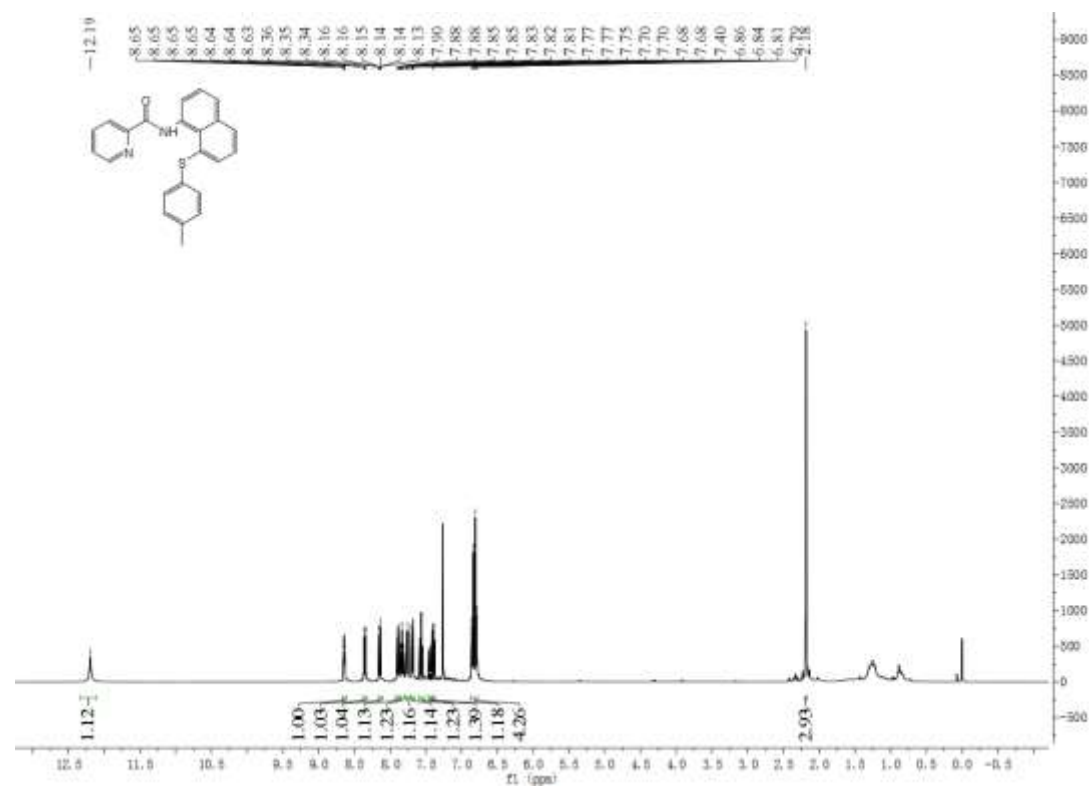

$^{13}\text{C}$  NMR of compound **3b** (in  $\text{CDCl}_3$ )

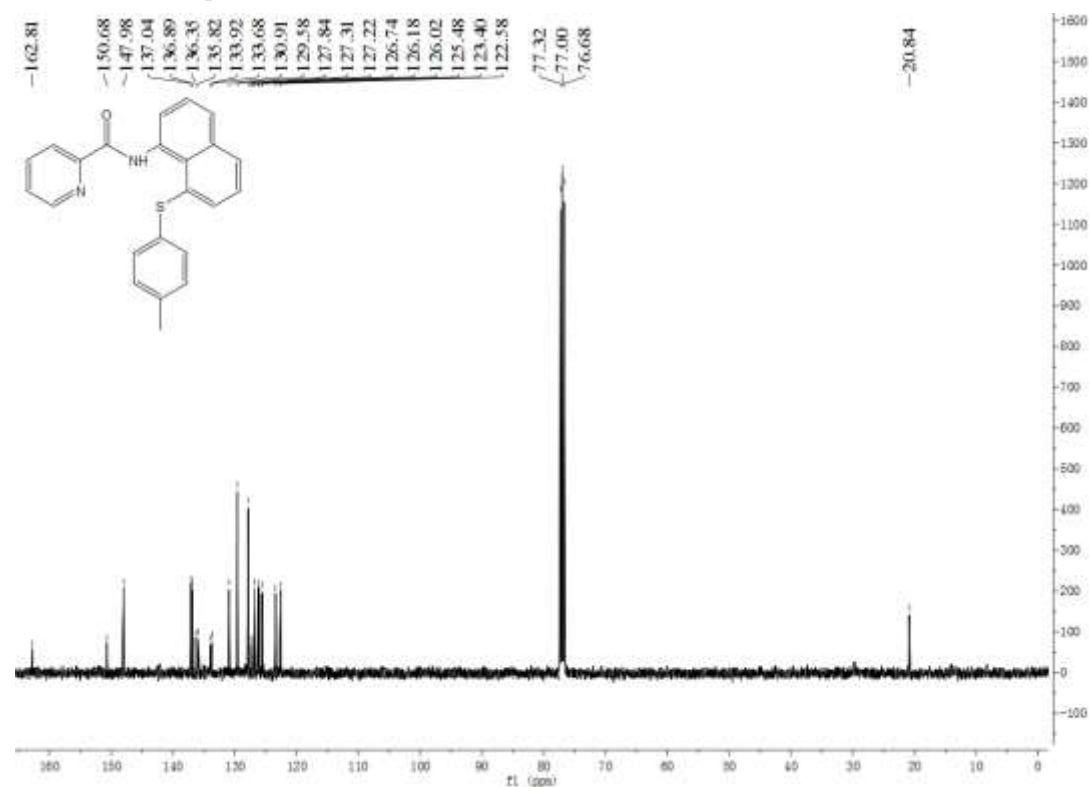

<sup>1</sup>H NMR of compound **3c** (in CDCl<sub>3</sub>)

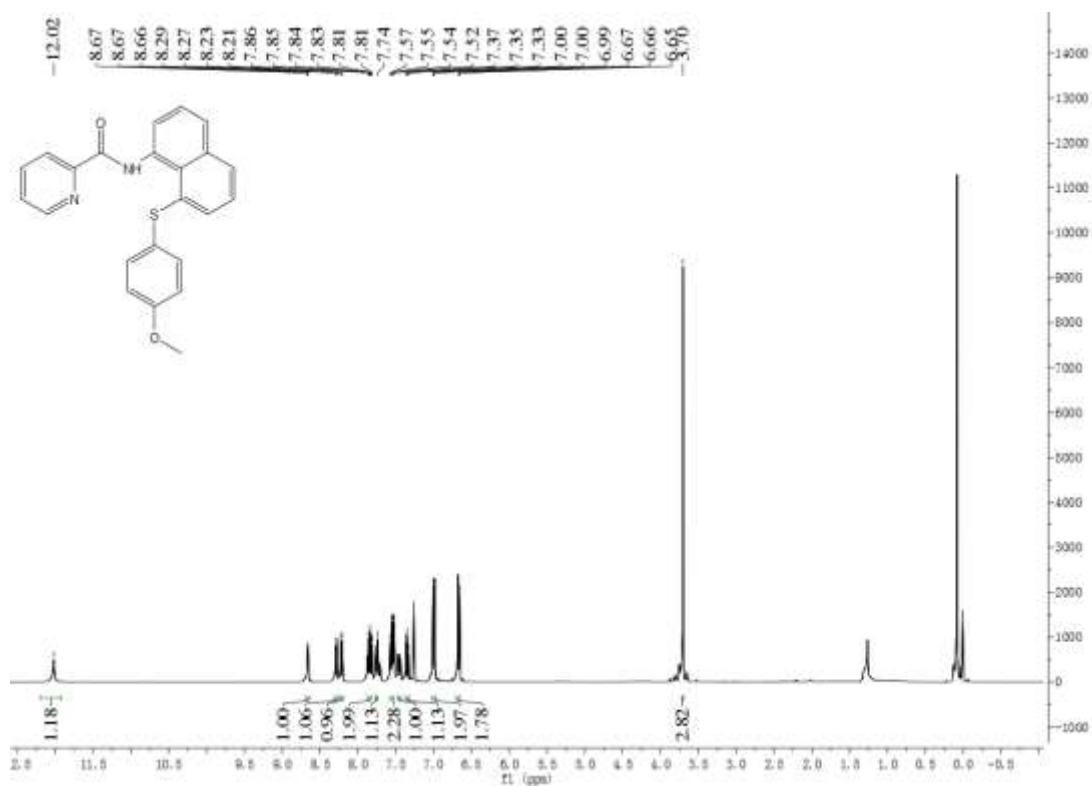

<sup>13</sup>C NMR of compound **3c** (in CDCl<sub>3</sub>)

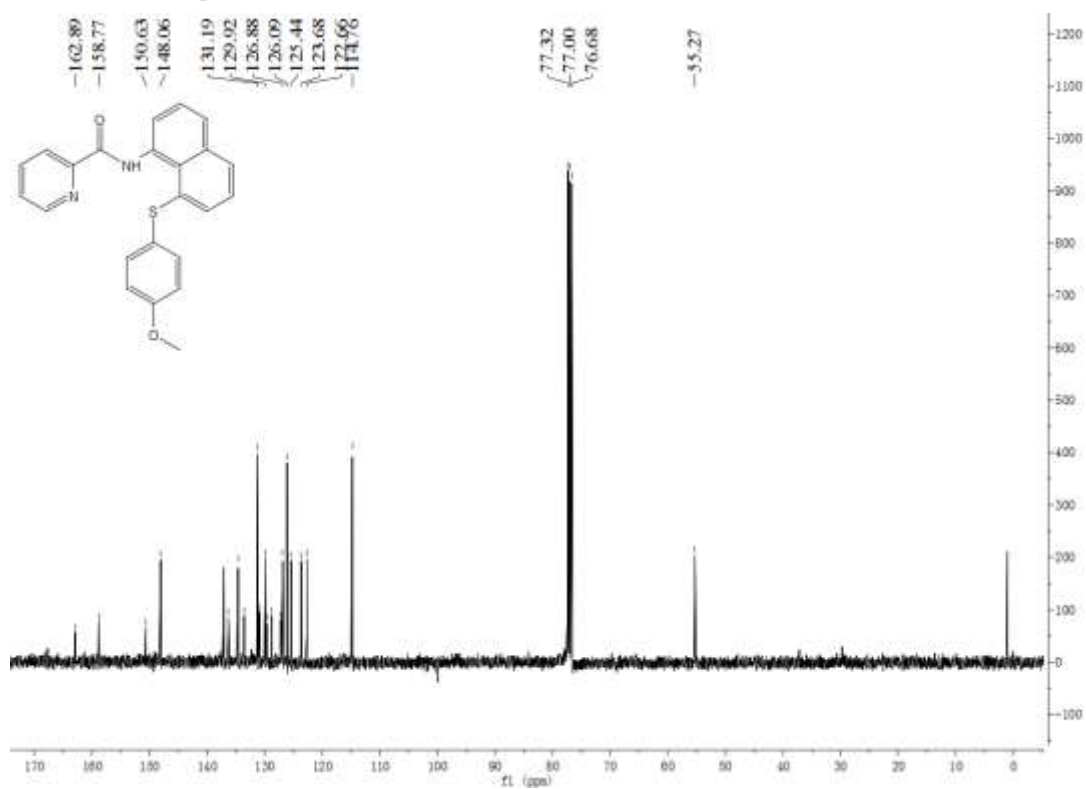

<sup>1</sup>H NMR of compound **3d** (in CDCl<sub>3</sub>)

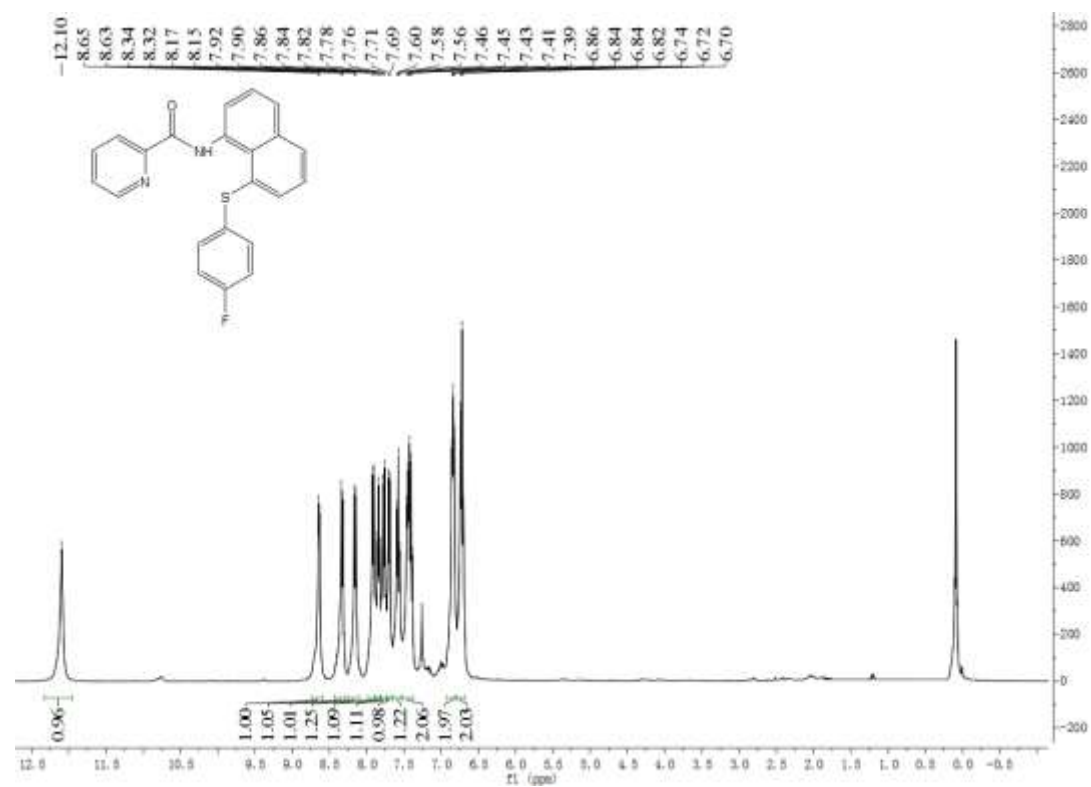

<sup>13</sup>C NMR of compound **3d** (in CDCl<sub>3</sub>)

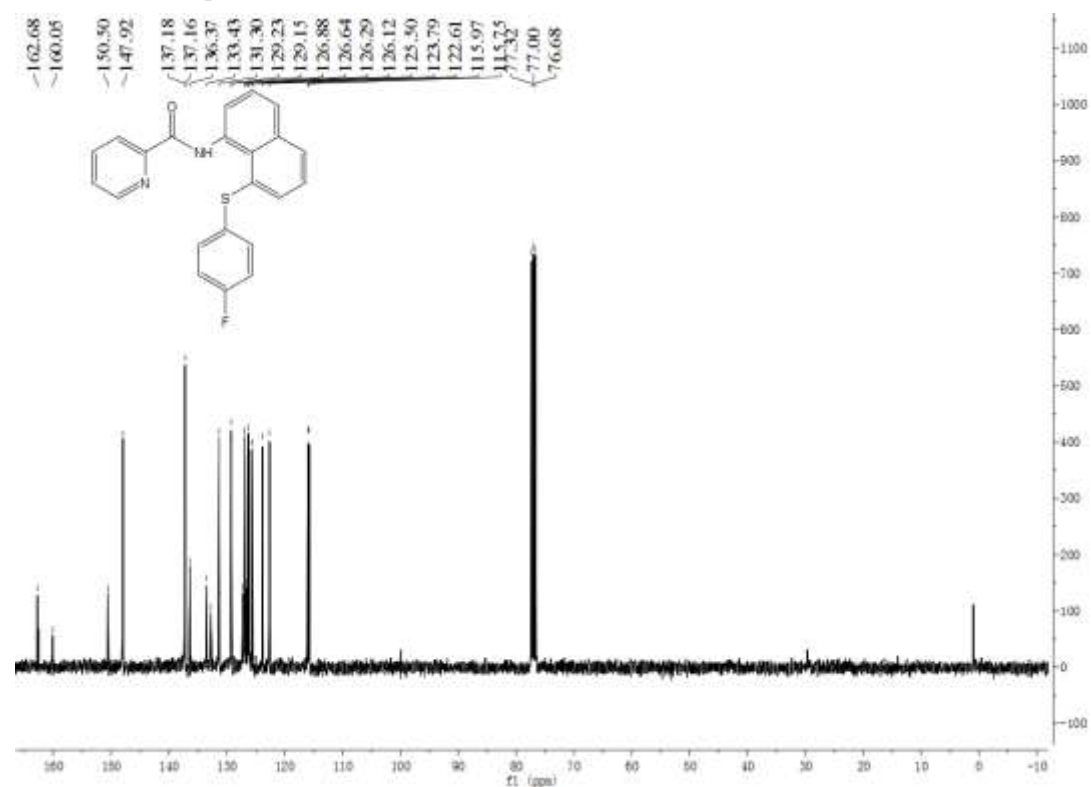

$^{19}\text{F}$  NMR of compound **3d** (in  $\text{CDCl}_3$ )

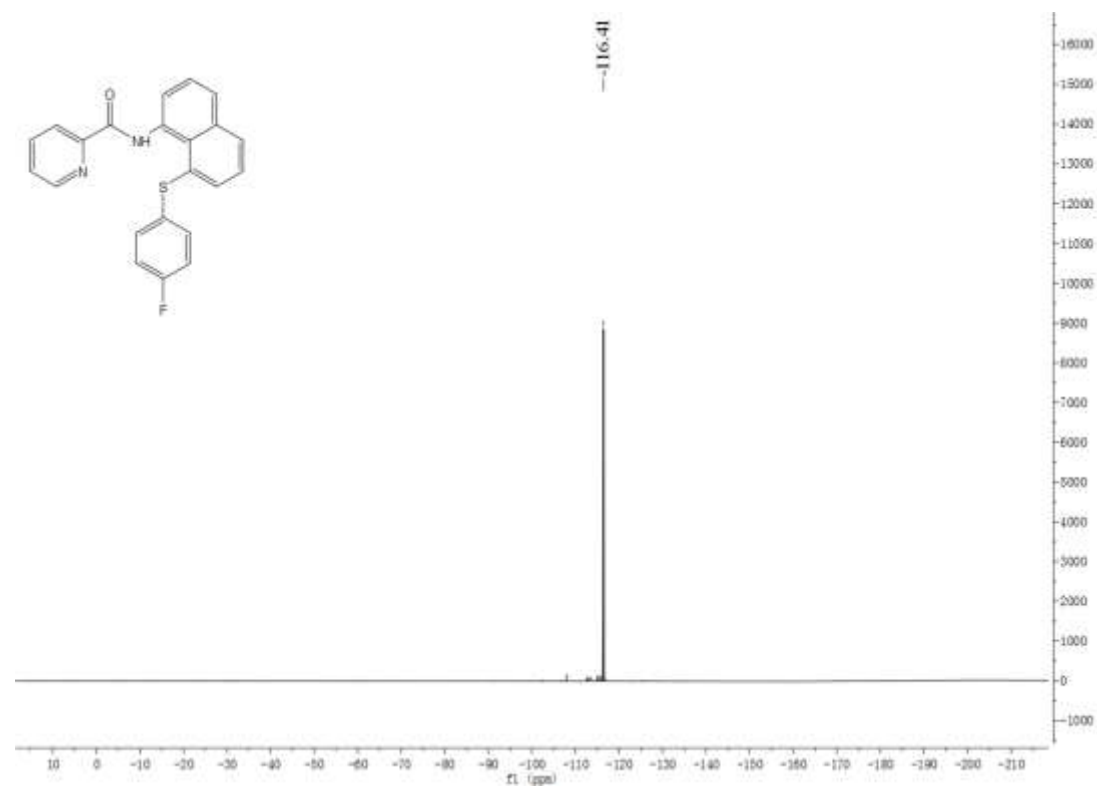

<sup>1</sup>H NMR of compound **3e** (in CDCl<sub>3</sub>)

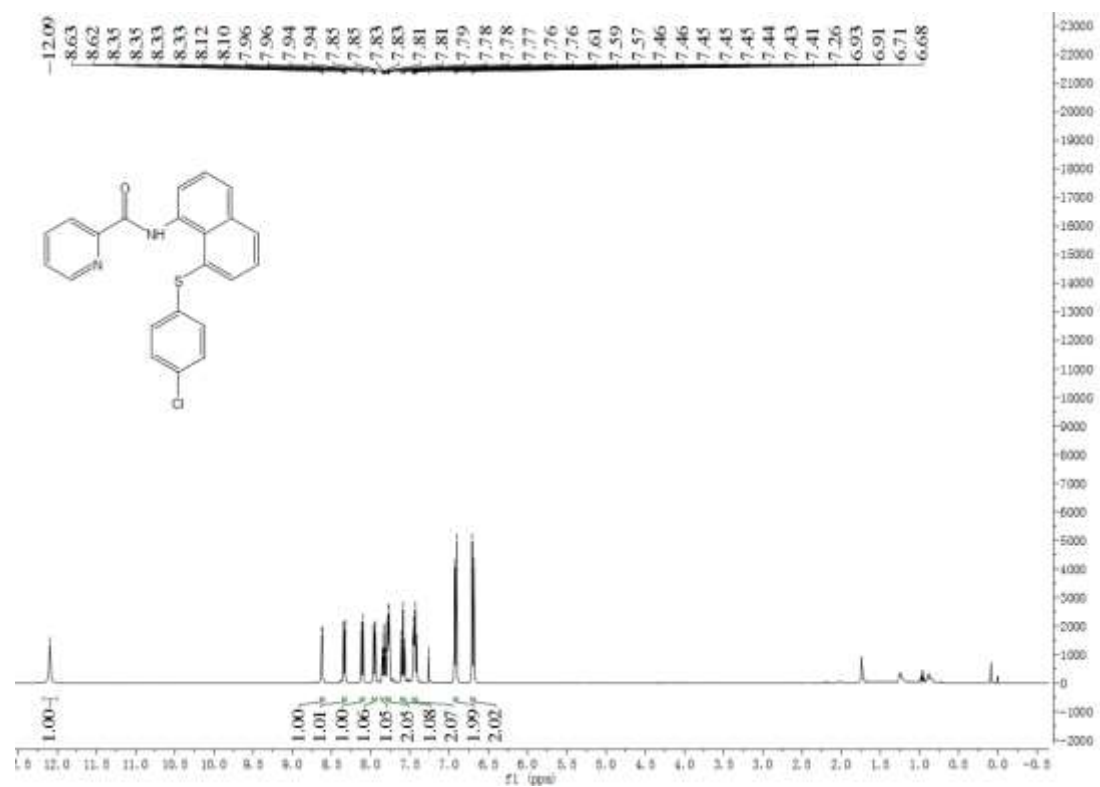

<sup>13</sup>C NMR of compound **3e** (in CDCl<sub>3</sub>)

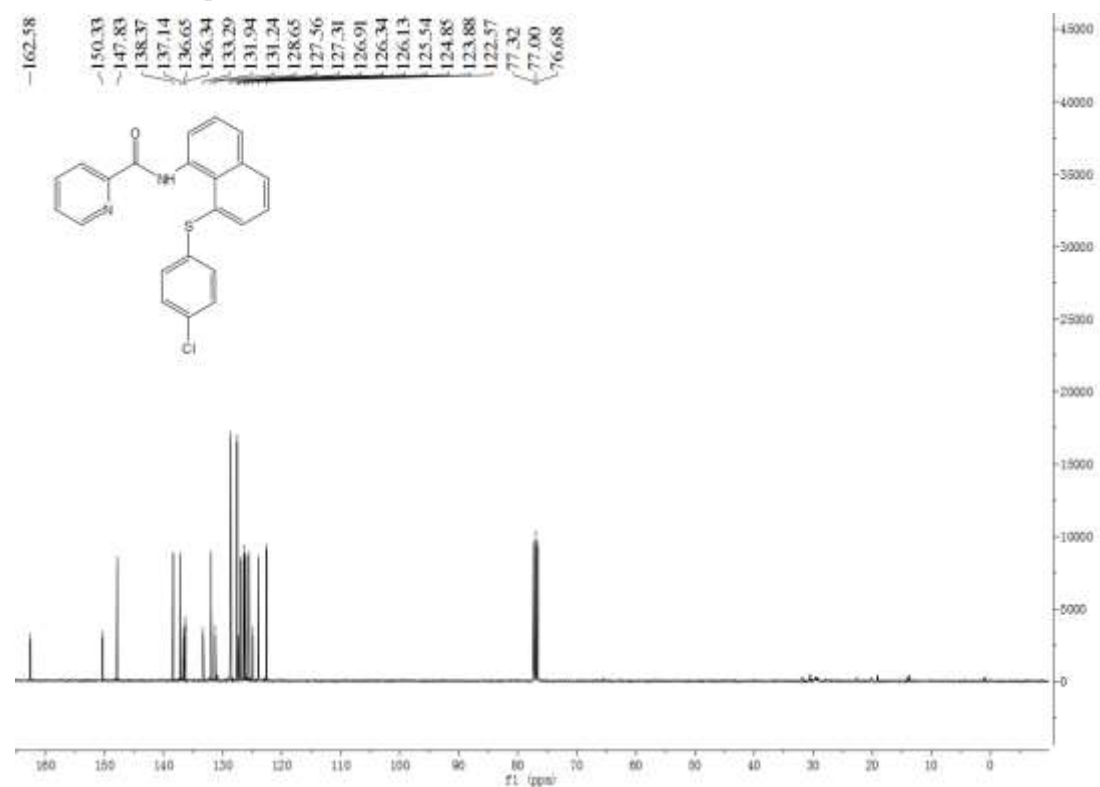

<sup>1</sup>H NMR of compound **3f** (in CDCl<sub>3</sub>)

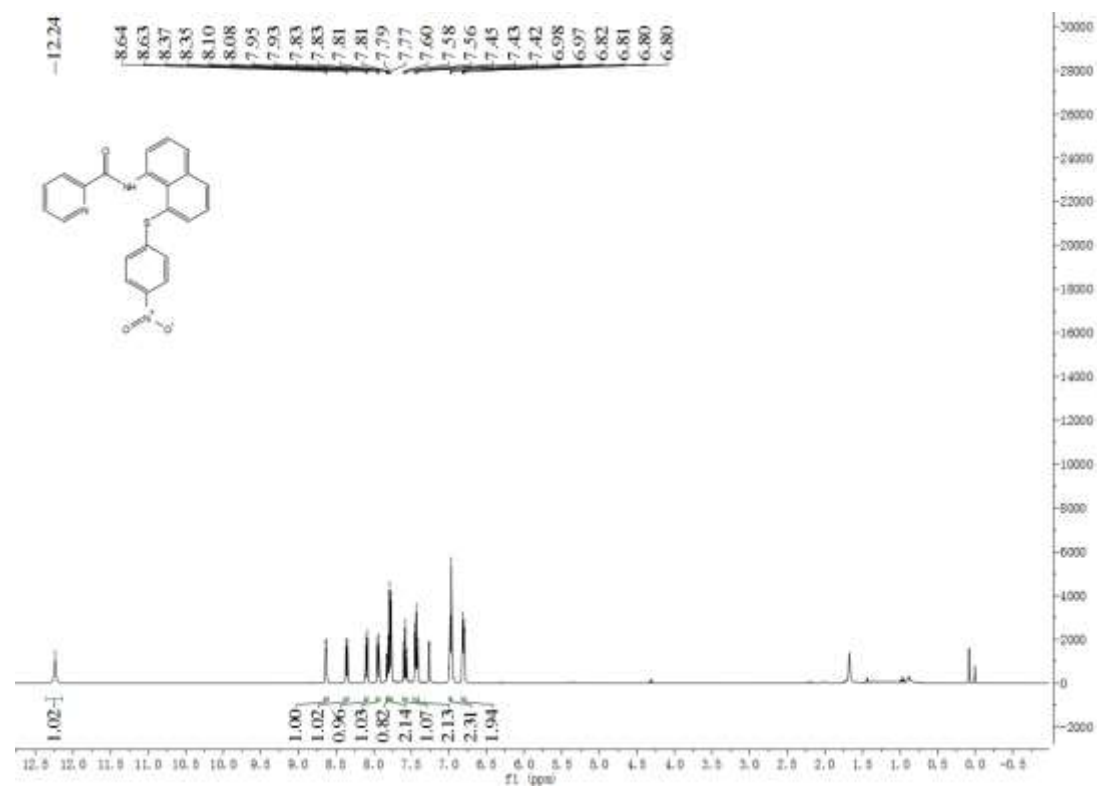

<sup>13</sup>C NMR of compound **3f** (in CDCl<sub>3</sub>)

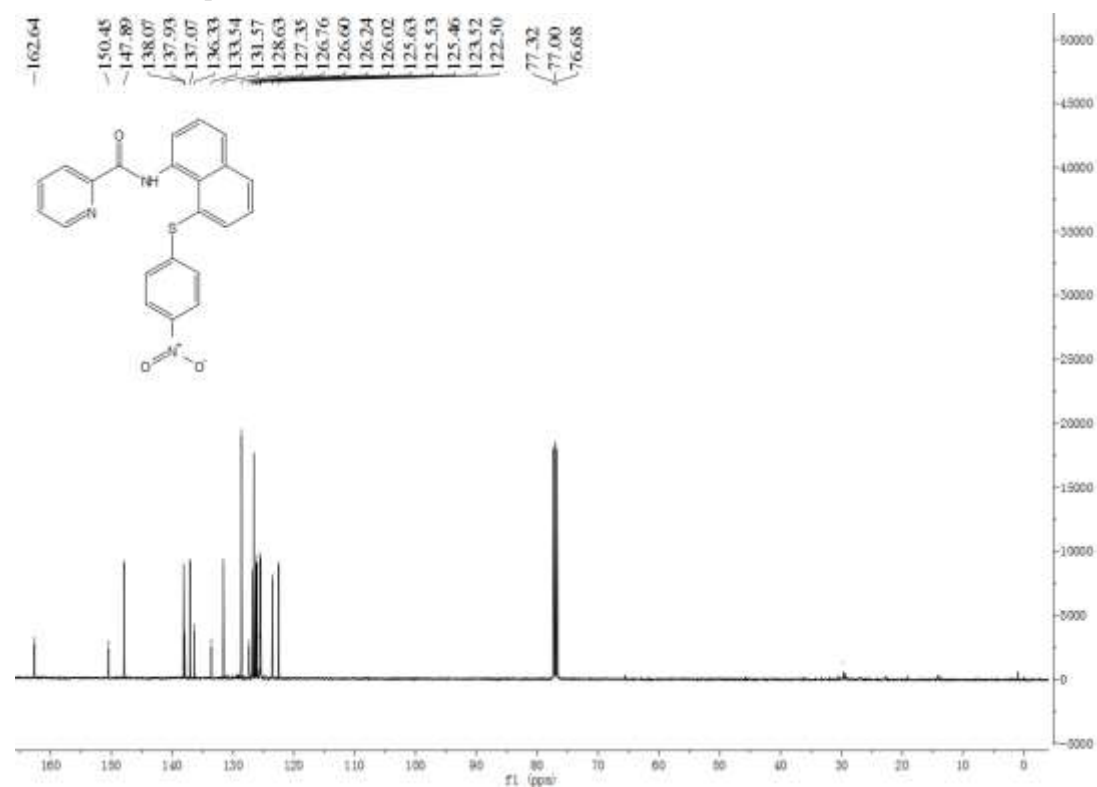



$^1\text{H}$  NMR of compound **3g** (in  $\text{CDCl}_3$ )

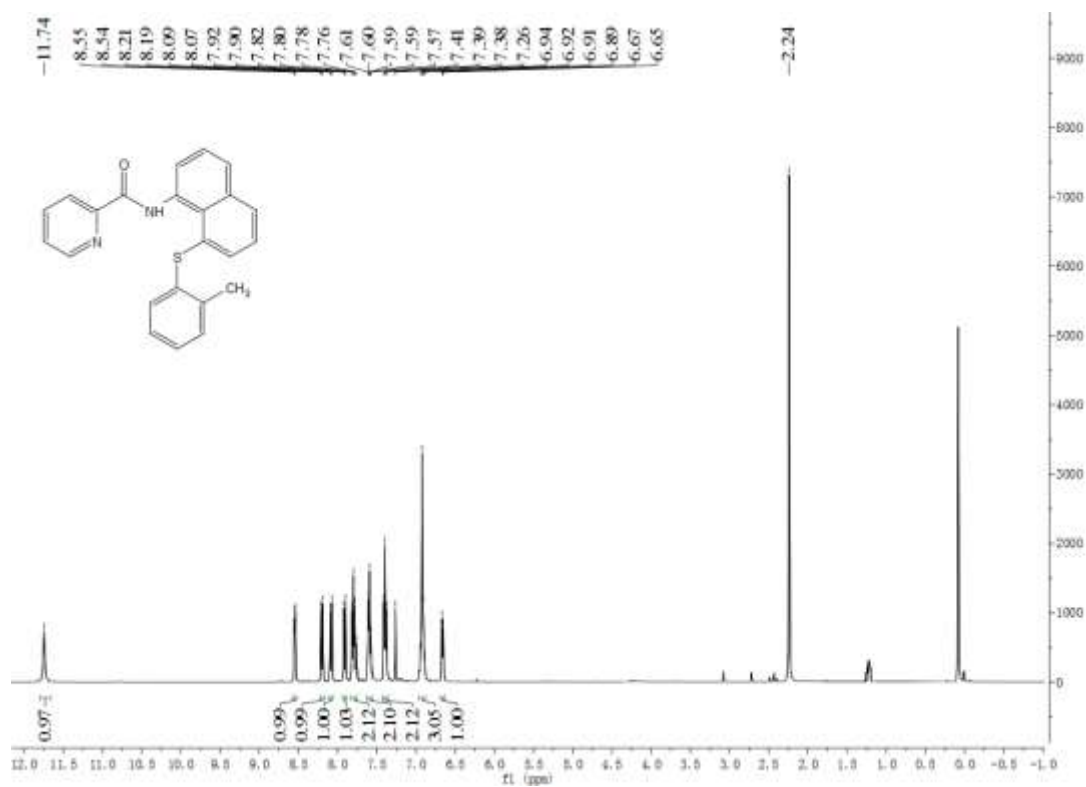

$^{13}\text{C}$  NMR of compound **3g** (in  $\text{CDCl}_3$ )

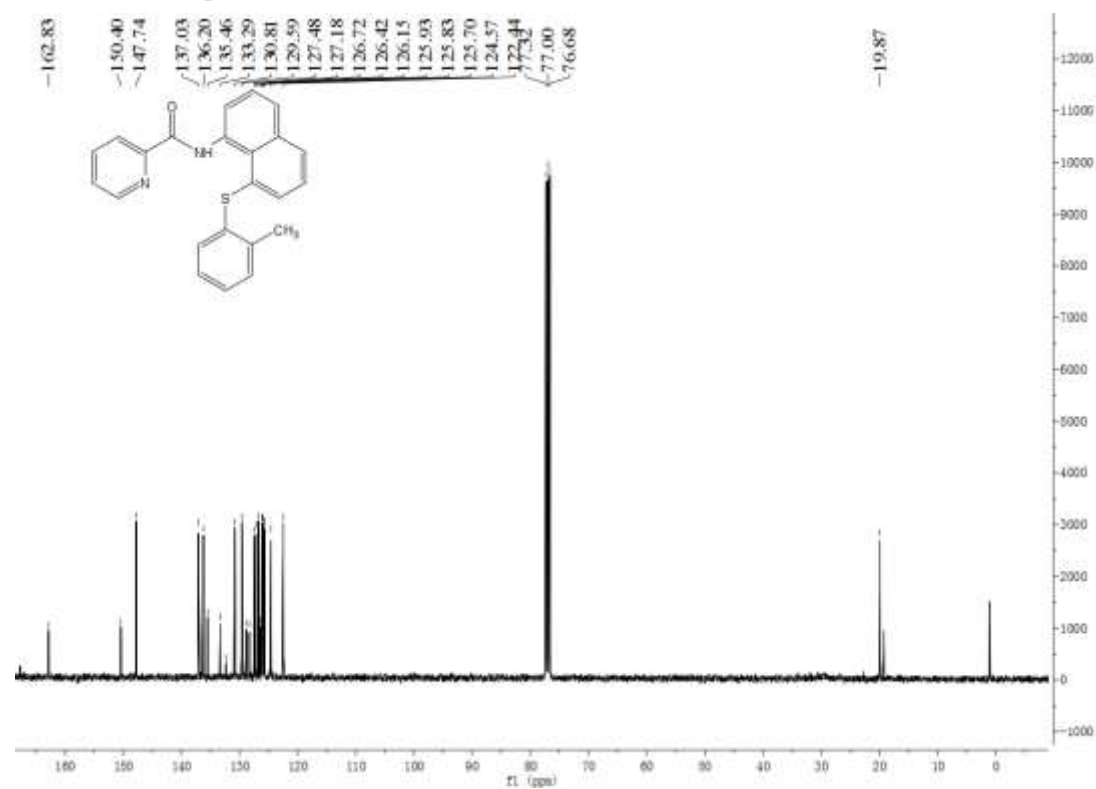

$^1\text{H}$  NMR of compound **3h** (in  $\text{CDCl}_3$ )

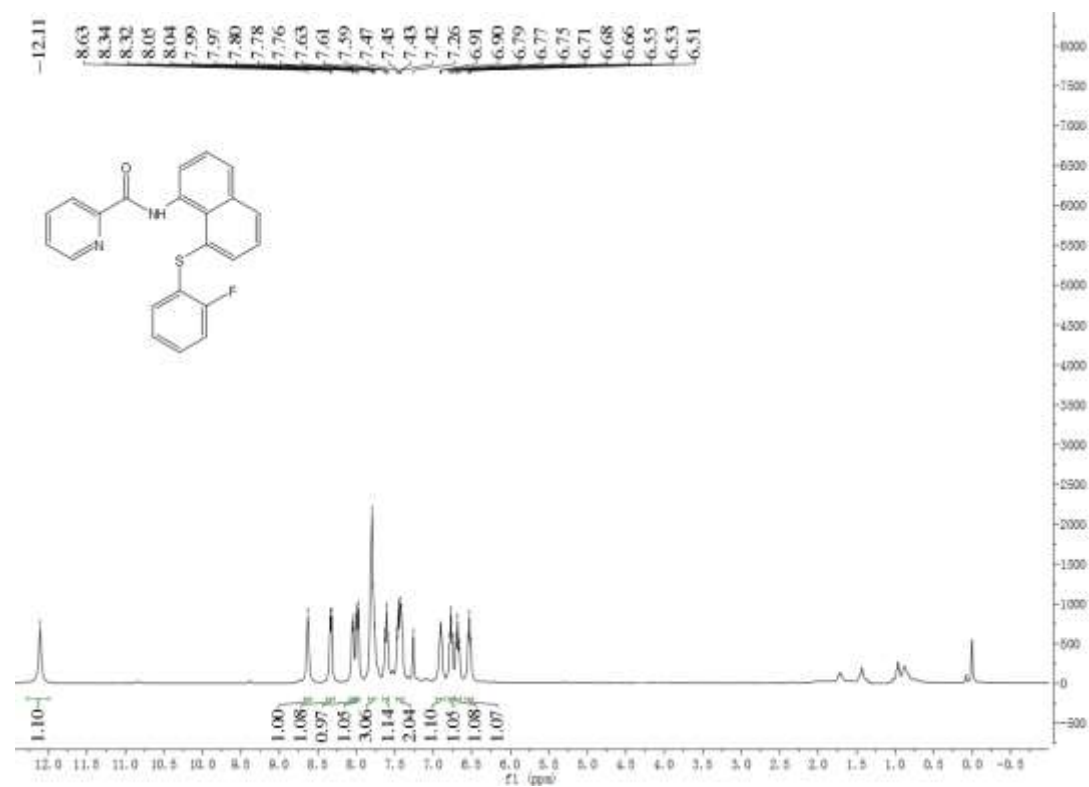

$^{13}\text{C}$  NMR of compound **3h** (in  $\text{CDCl}_3$ )

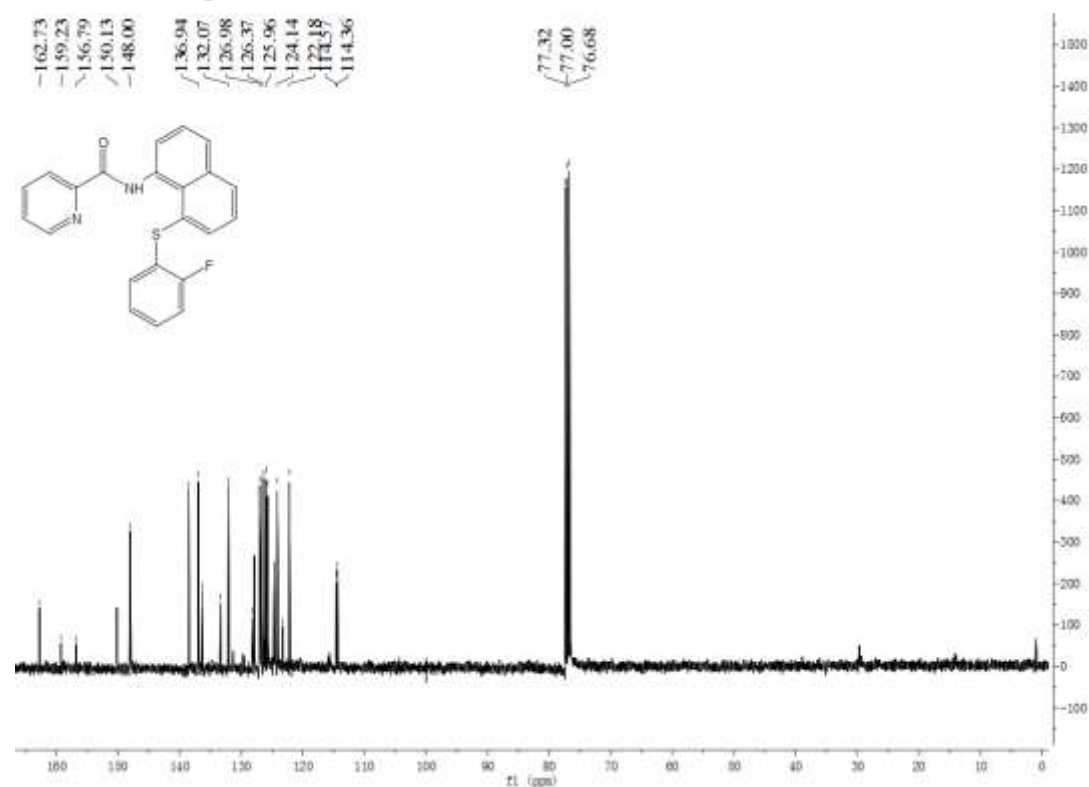

$^{19}\text{F}$  NMR of compound **3h** (in  $\text{CDCl}_3$ )

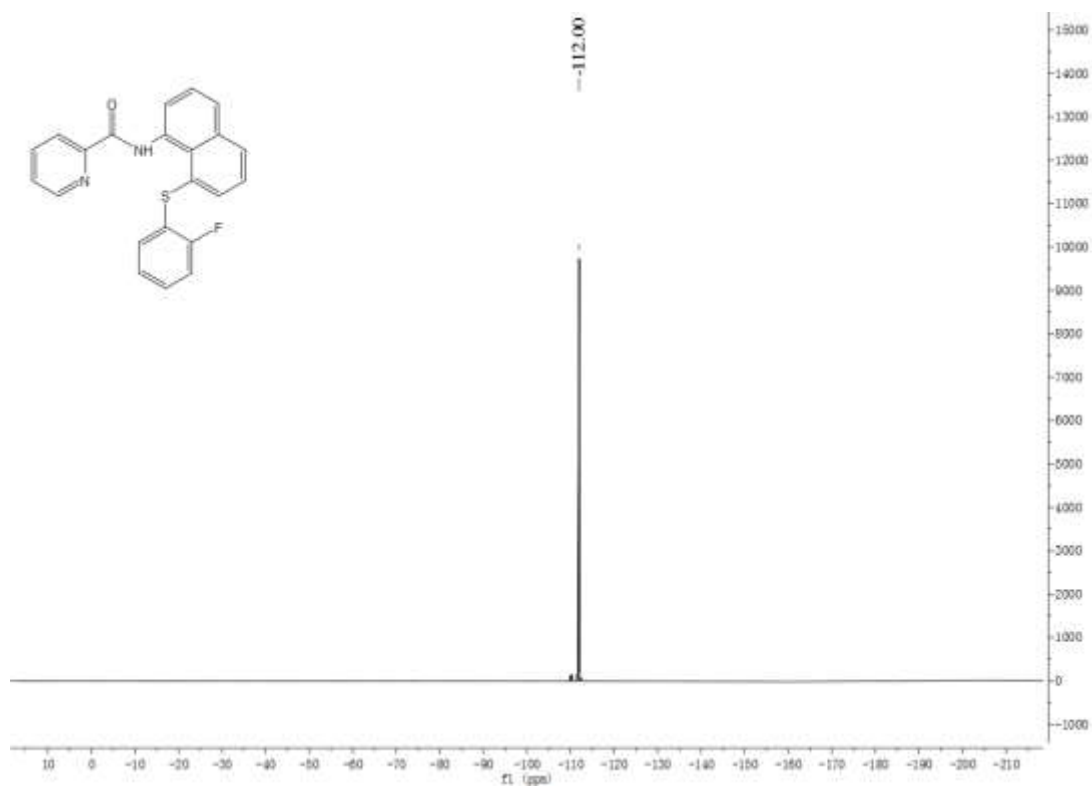

<sup>1</sup>H NMR of compound **3i** (in CDCl<sub>3</sub>)

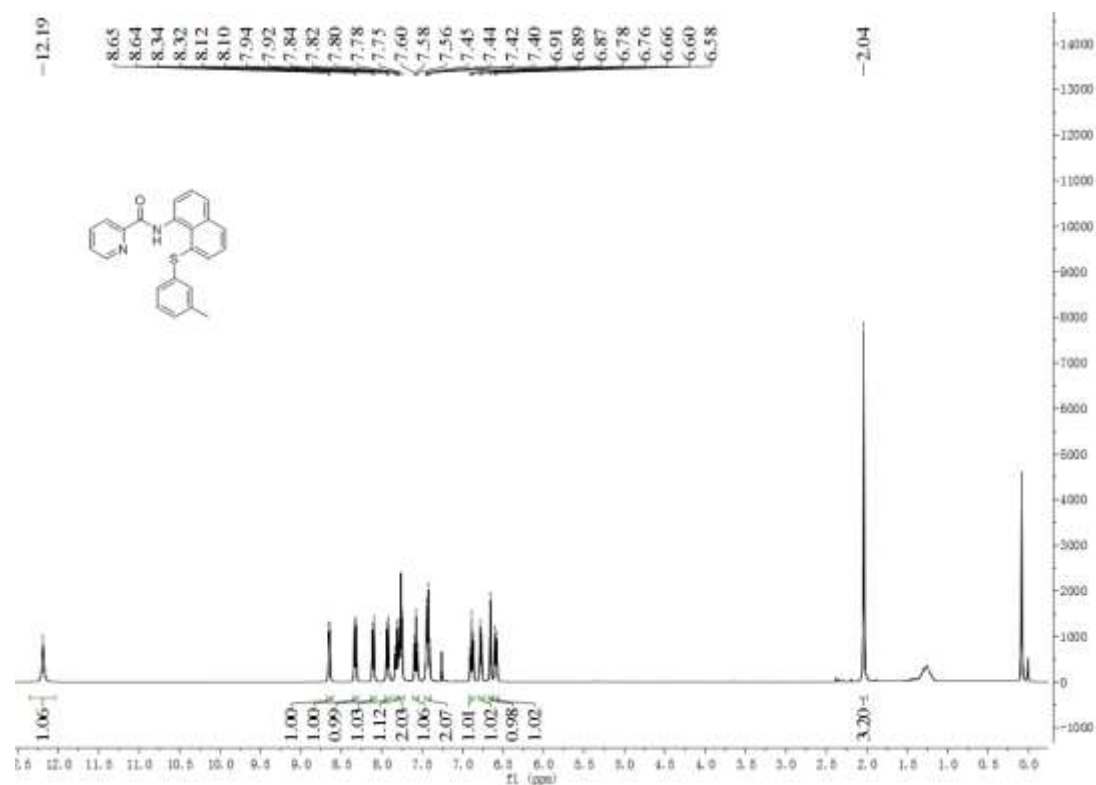

<sup>13</sup>C NMR of compound **3i** (in CDCl<sub>3</sub>)

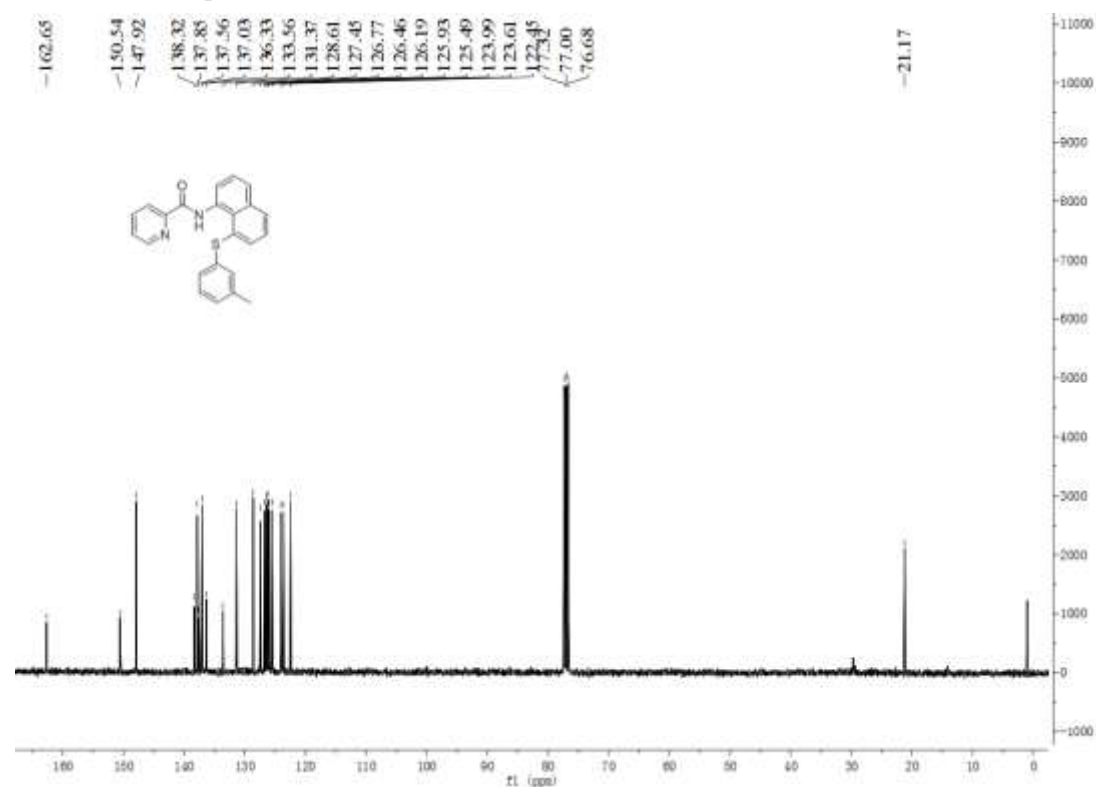

$^1\text{H}$  NMR of compound **3j** (in  $\text{CDCl}_3$ )

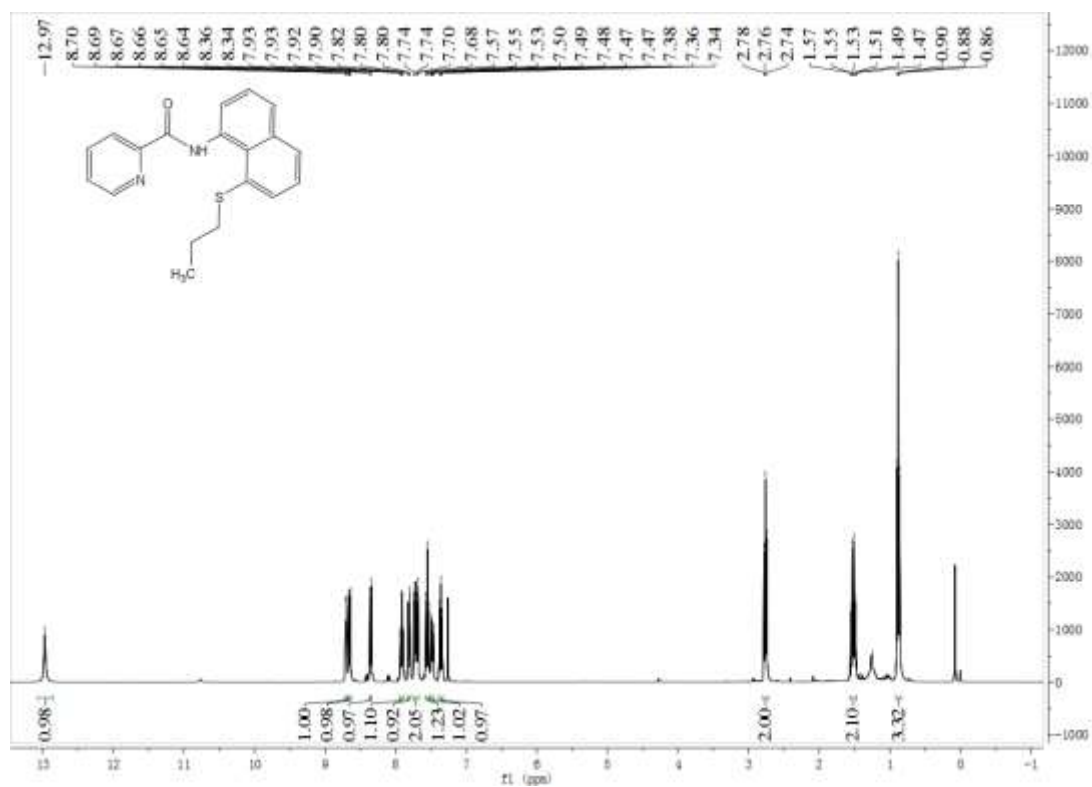

$^{13}\text{C}$  NMR of compound **3j** (in  $\text{CDCl}_3$ )

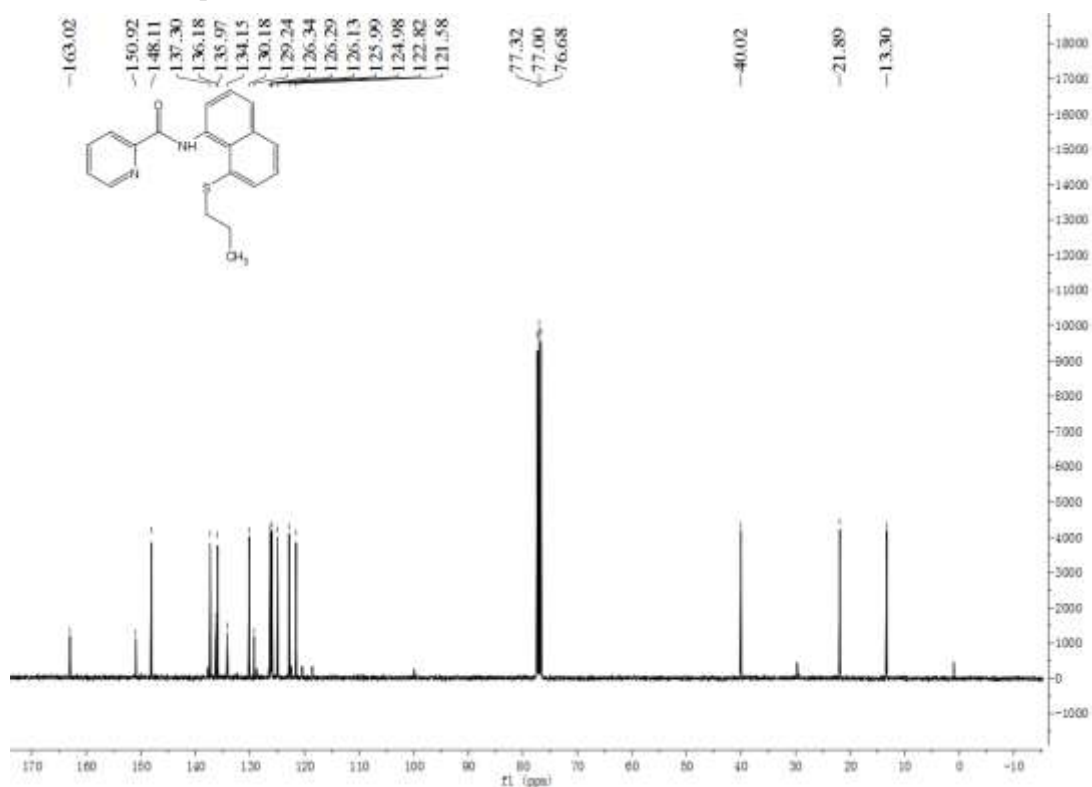

<sup>1</sup>H NMR of compound **3k** (in CDCl<sub>3</sub>)

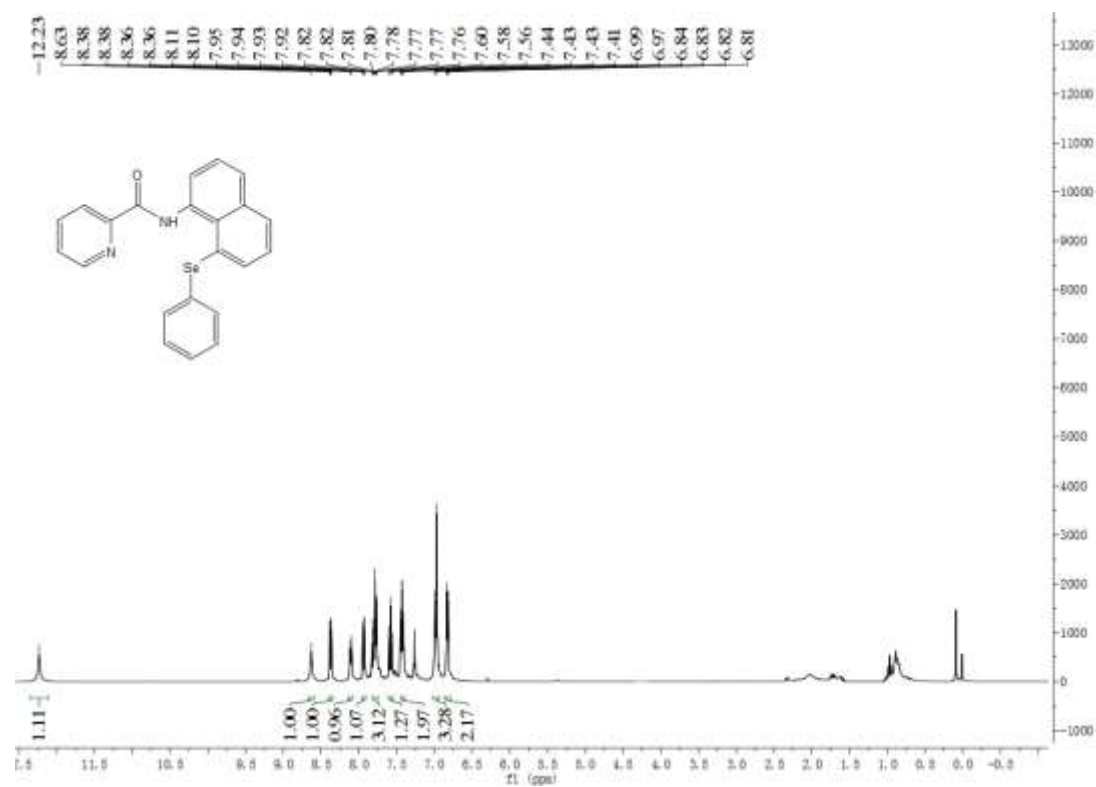

<sup>13</sup>C NMR of compound **3k** (in CDCl<sub>3</sub>)

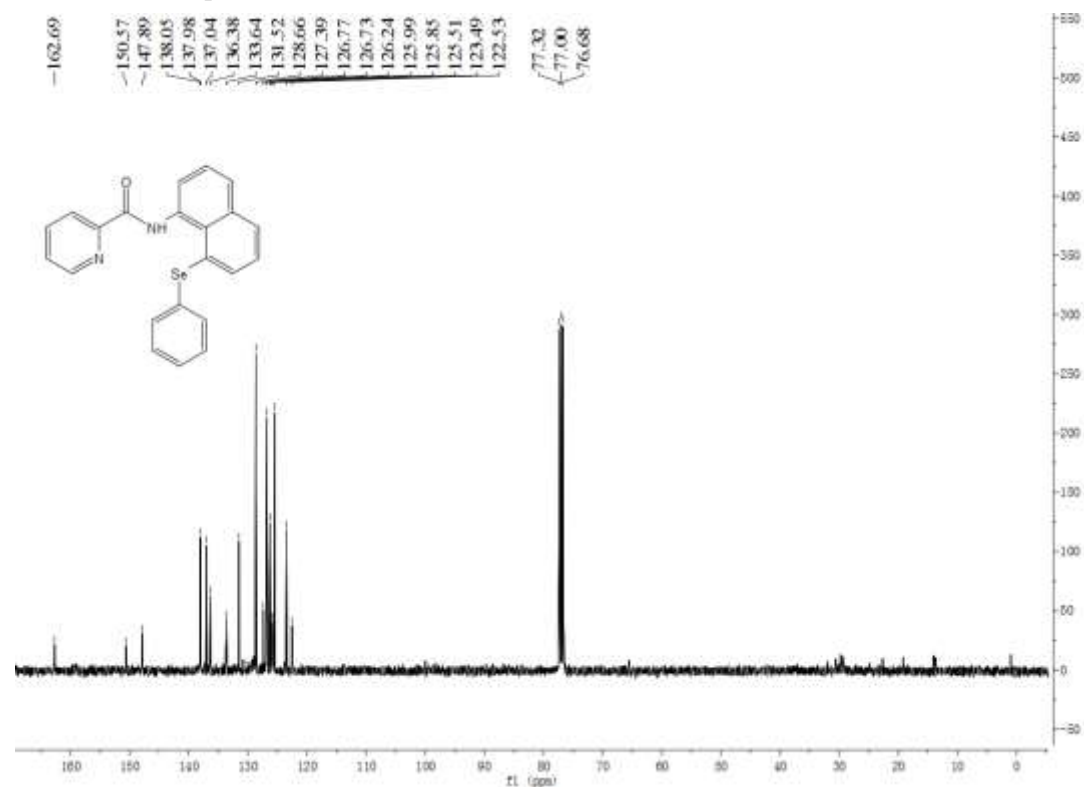

<sup>1</sup>H NMR of compound **31** (in CDCl<sub>3</sub>)

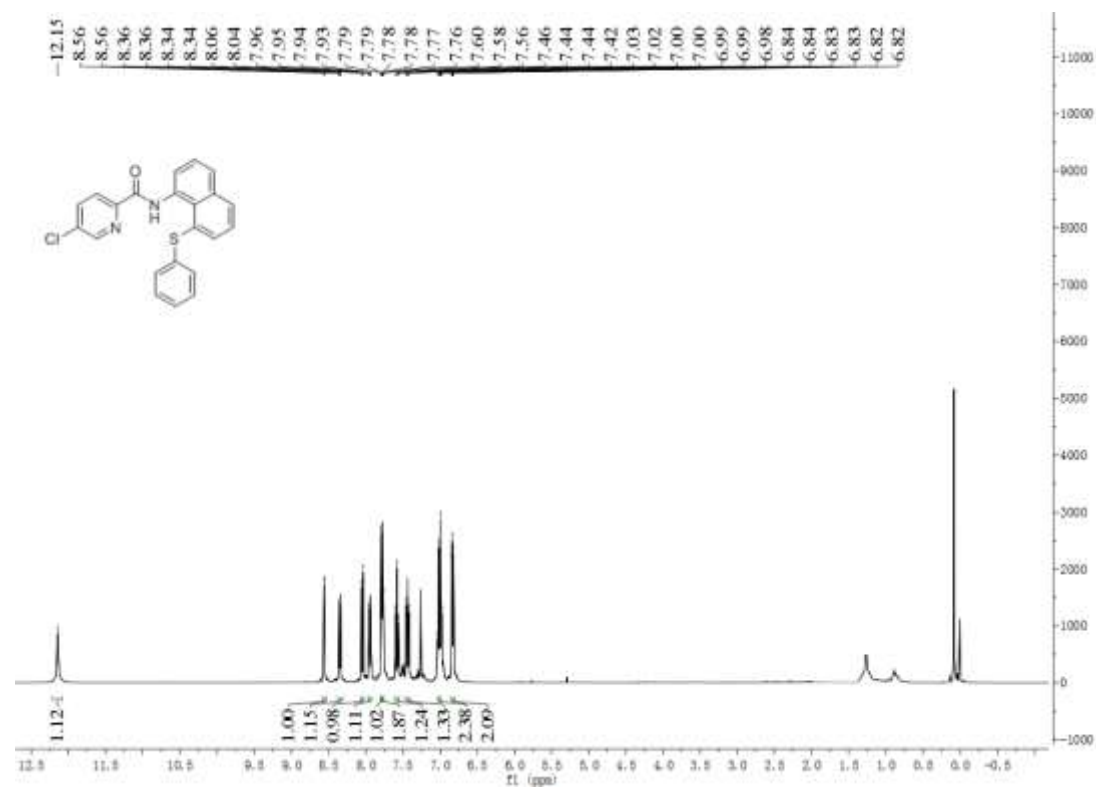

<sup>13</sup>C NMR of compound **31** (in CDCl<sub>3</sub>)

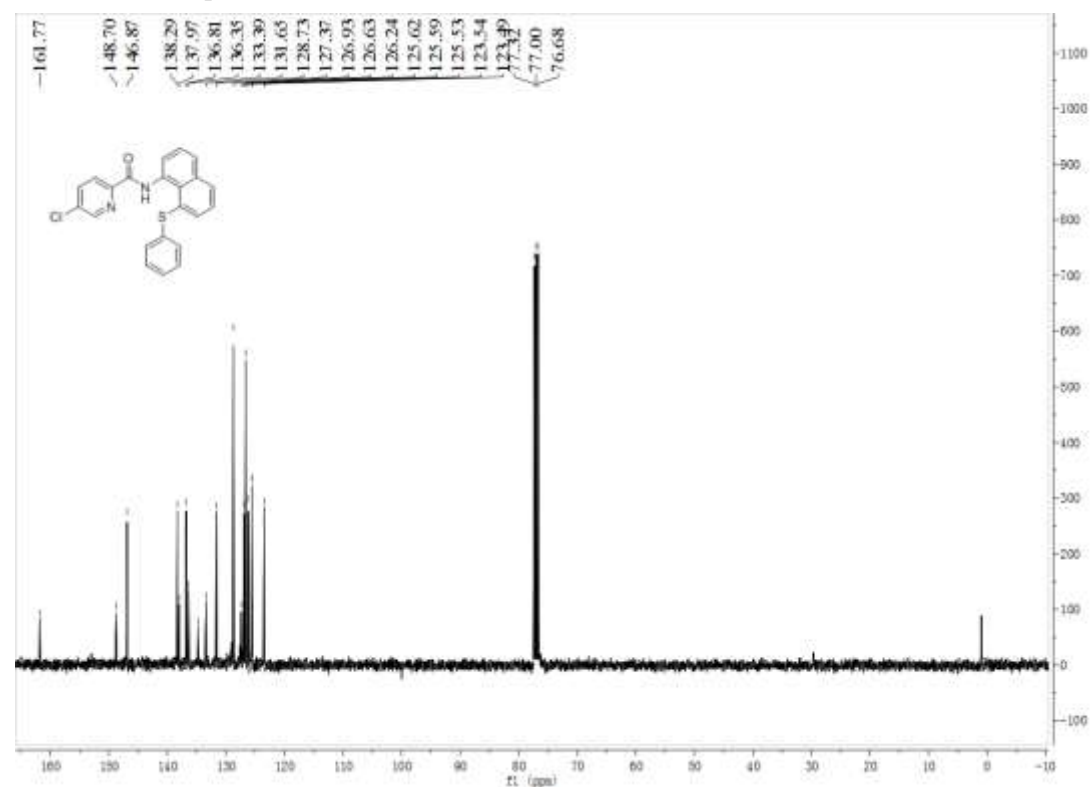

$^1\text{H}$  NMR of compound **3m** (in  $\text{CDCl}_3$ )

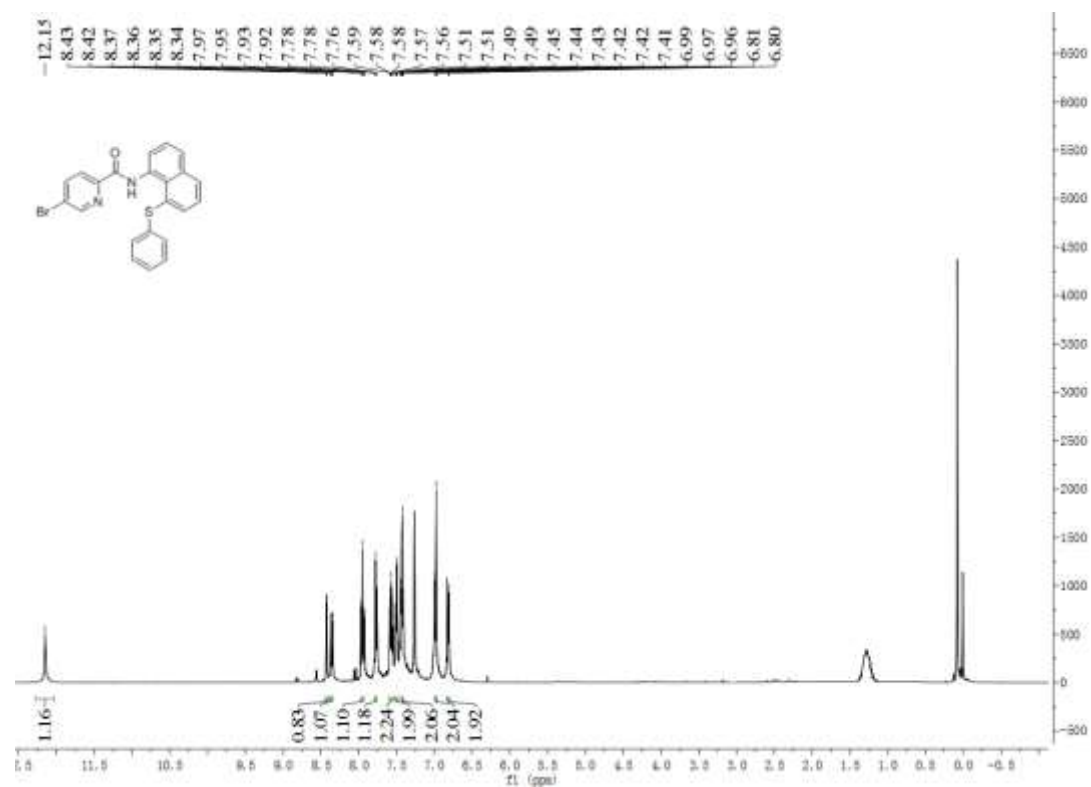

$^{13}\text{C}$  NMR of compound **3m** (in  $\text{CDCl}_3$ )

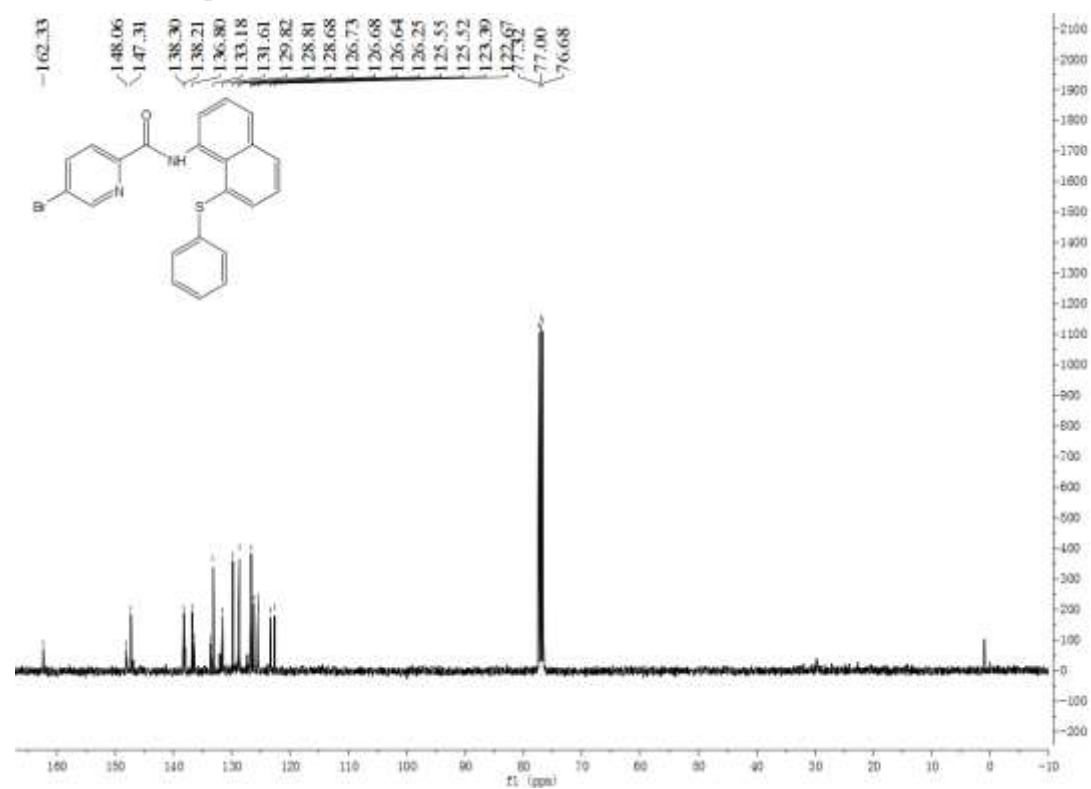



$^1\text{H}$  NMR of compound **3n** (in  $\text{CDCl}_3$ )

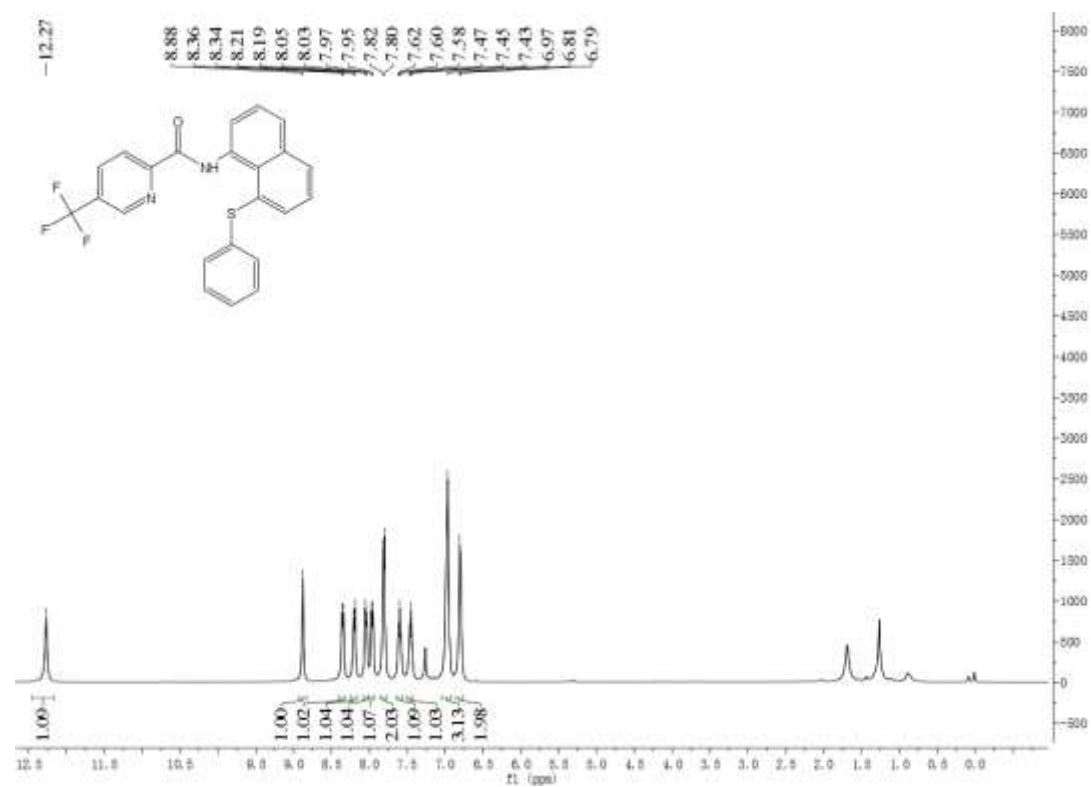

$^{13}\text{C}$  NMR of compound **3n** (in  $\text{CDCl}_3$ )

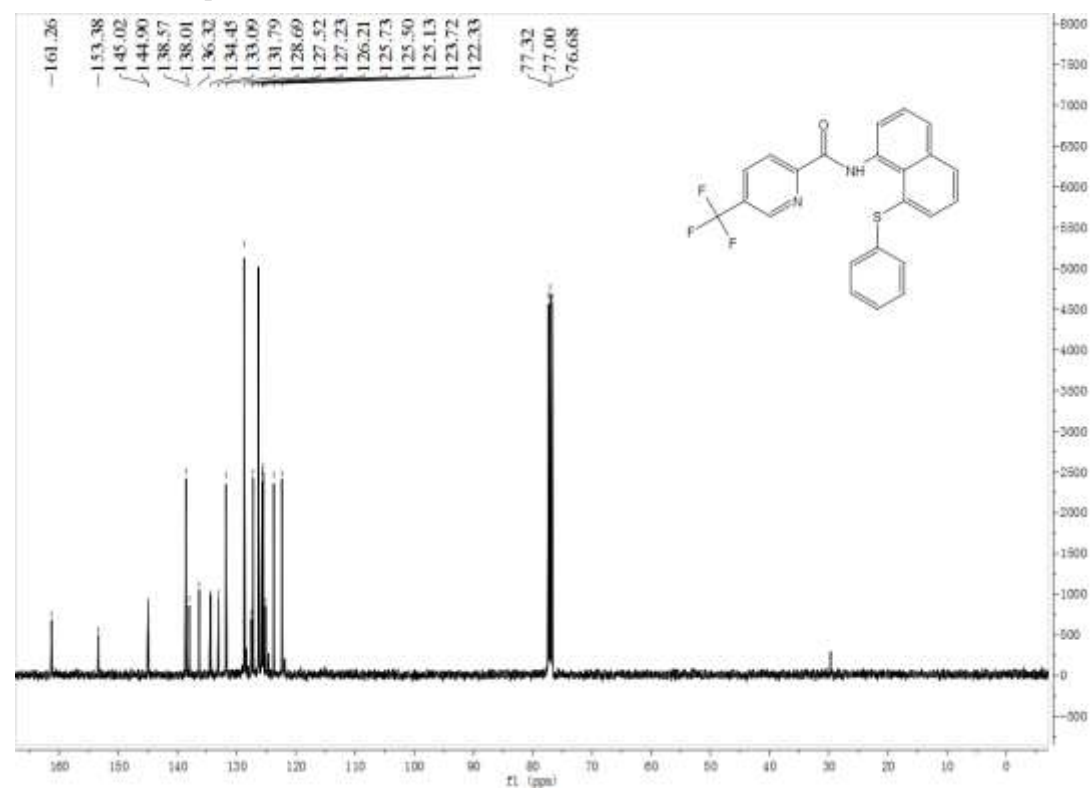

$^{19}\text{F}$  NMR of compound **3n** (in  $\text{CDCl}_3$ )

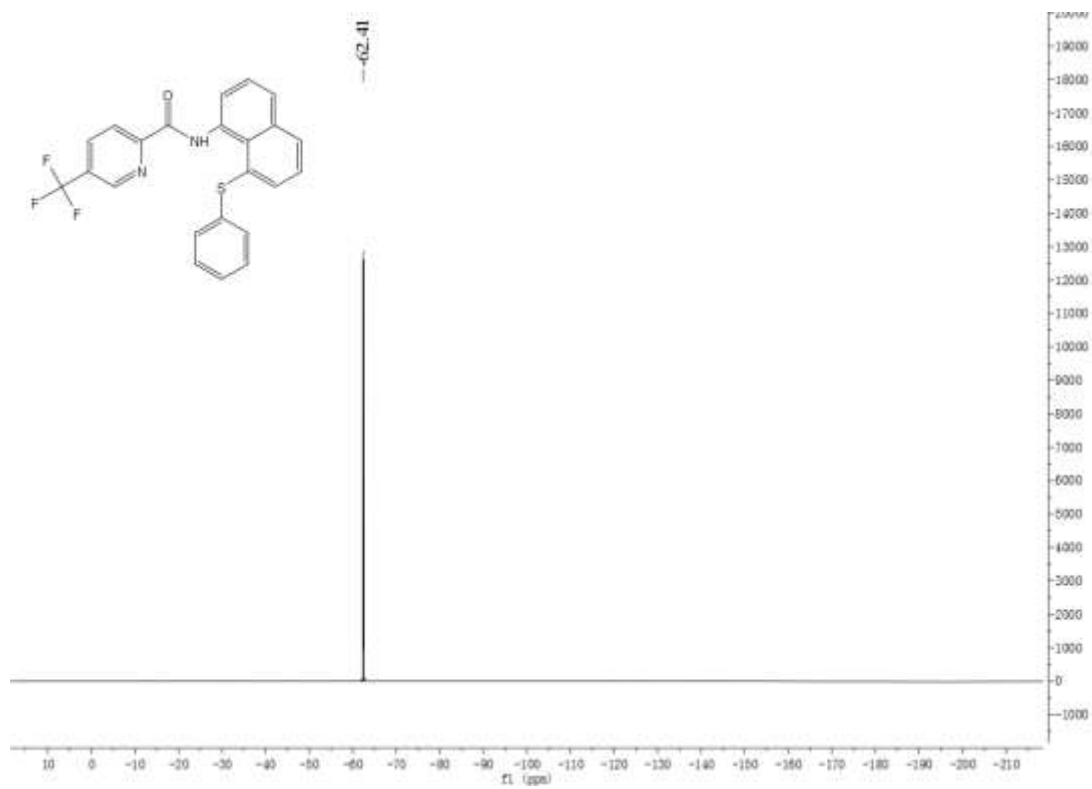

<sup>1</sup>H NMR of compound **3o** (in CDCl<sub>3</sub>)

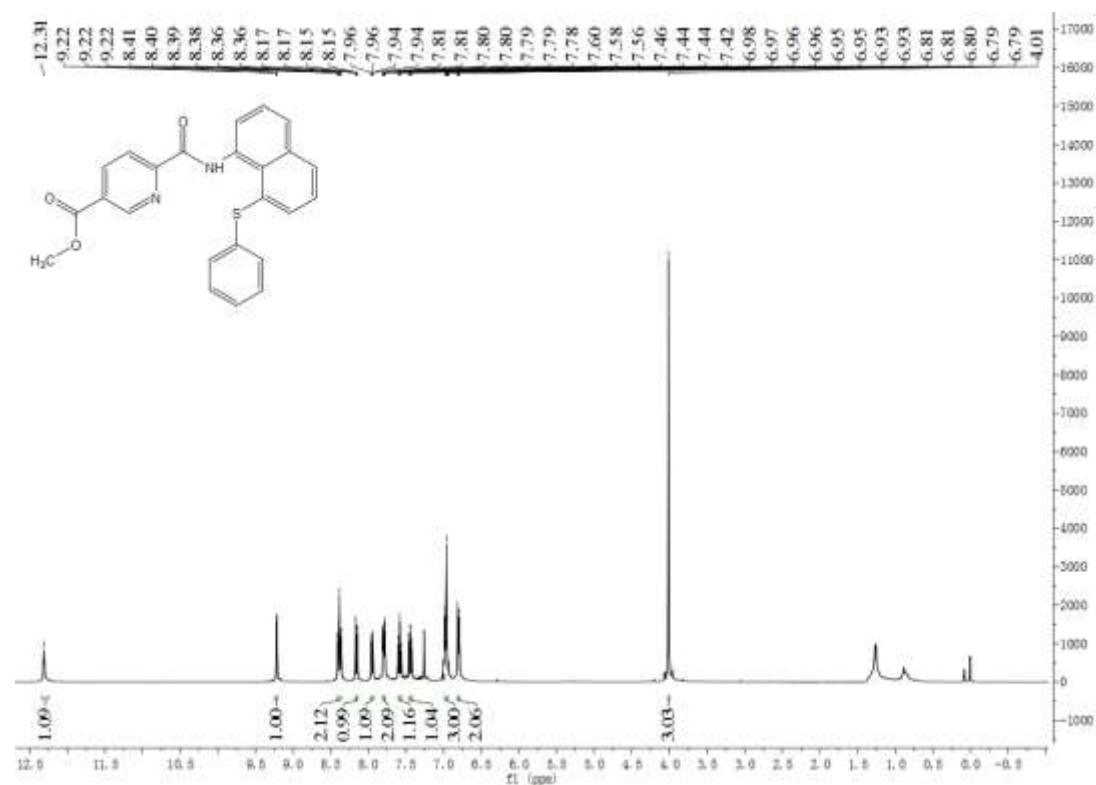

<sup>13</sup>C NMR of compound **3o** (in CDCl<sub>3</sub>)

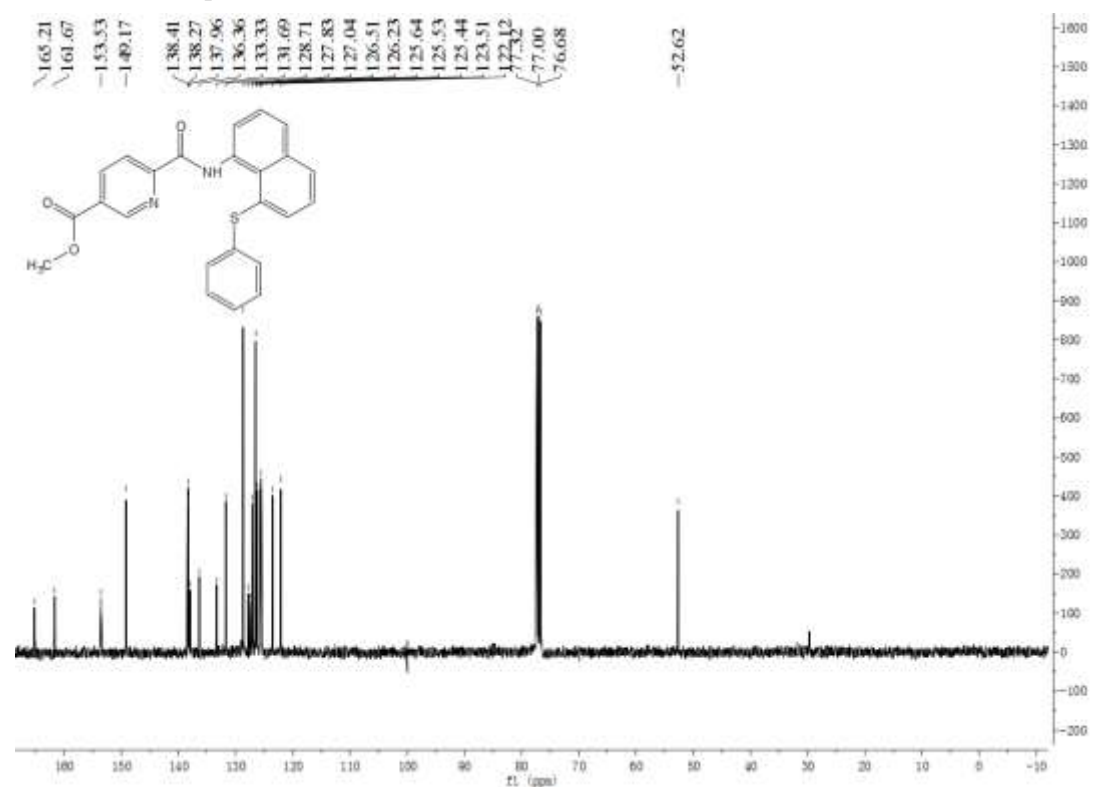

<sup>1</sup>H NMR of compound **3p** (in CDCl<sub>3</sub>)

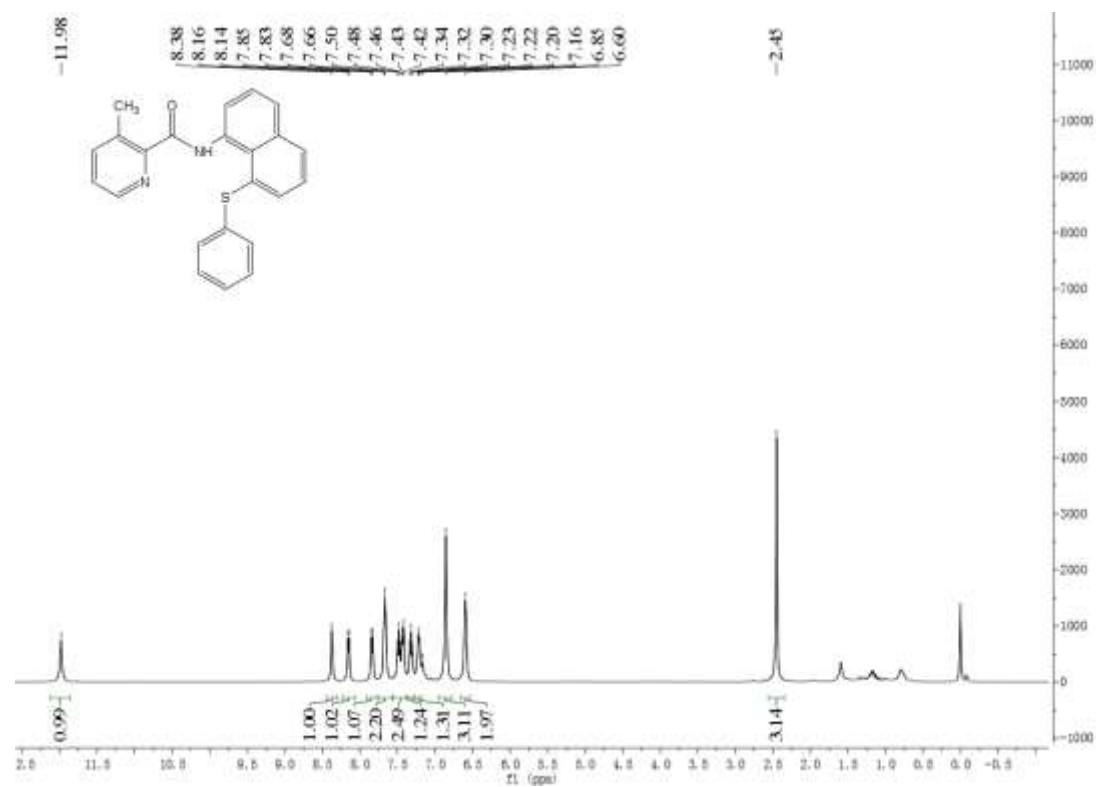

<sup>13</sup>C NMR of compound **3p** (in CDCl<sub>3</sub>)

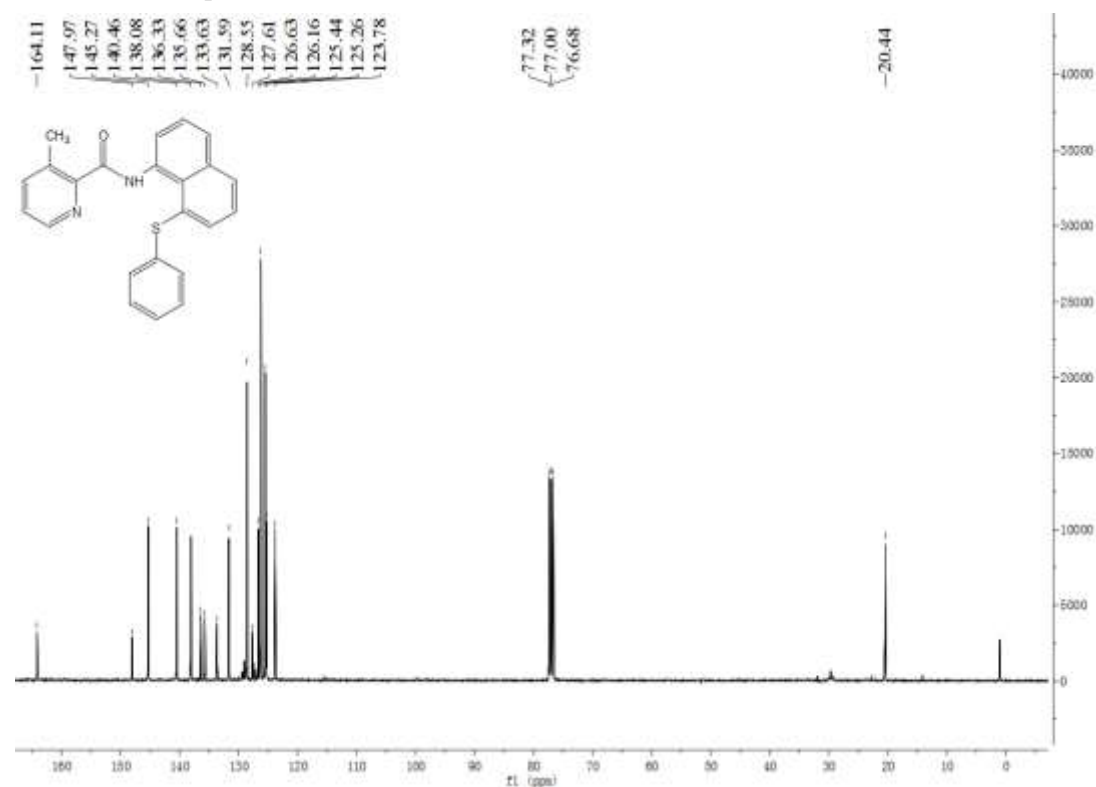

<sup>1</sup>H NMR of compound **3q** (in CDCl<sub>3</sub>)

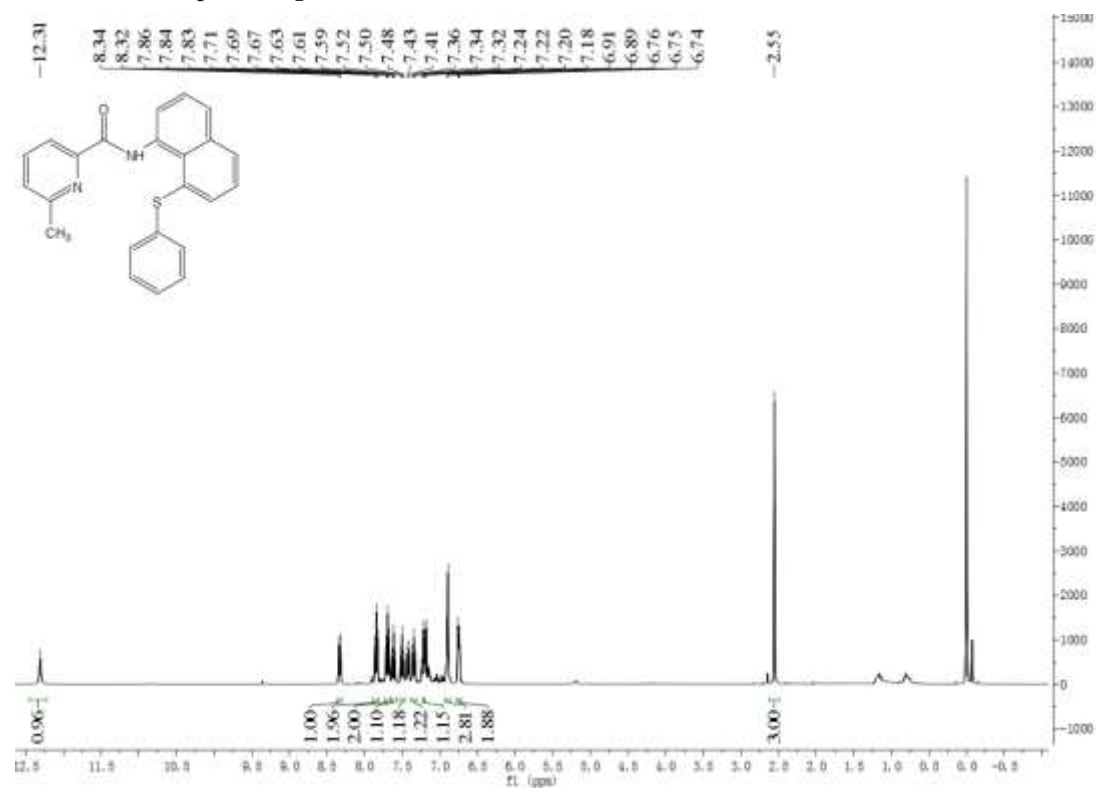

<sup>13</sup>C NMR of compound **3q** (in CDCl<sub>3</sub>)

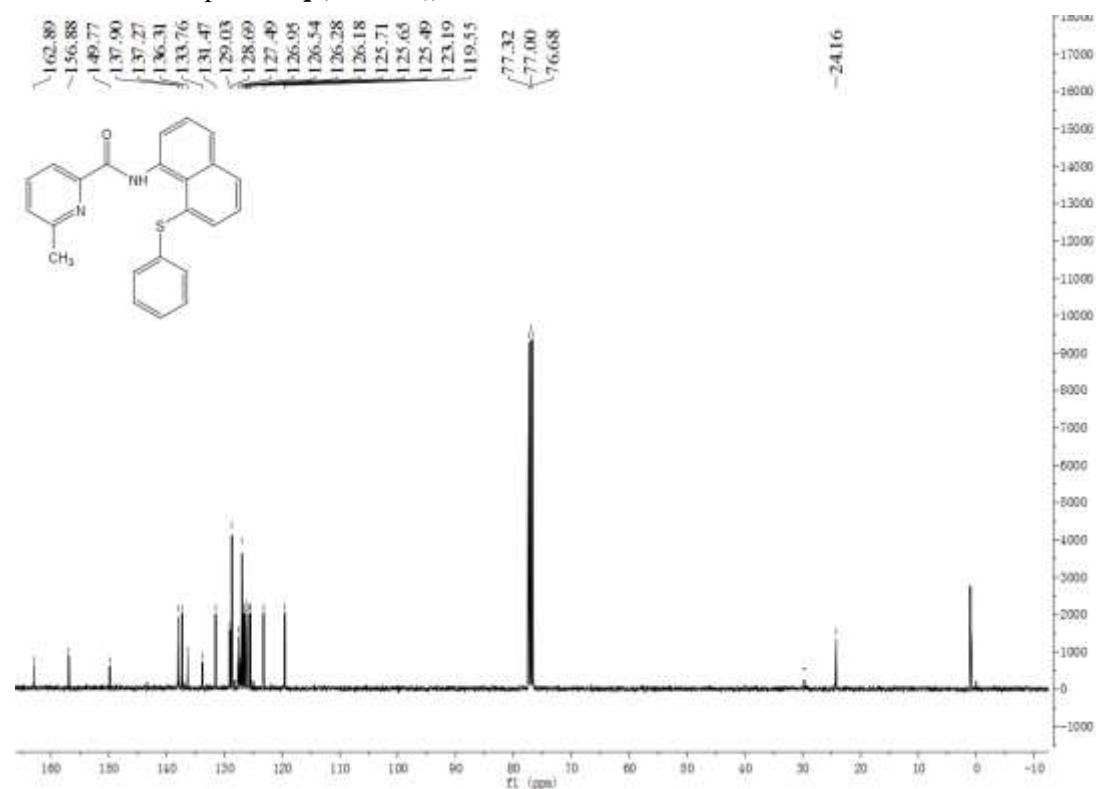

$^1\text{H}$  NMR of compound **3r** (in  $\text{CDCl}_3$ )

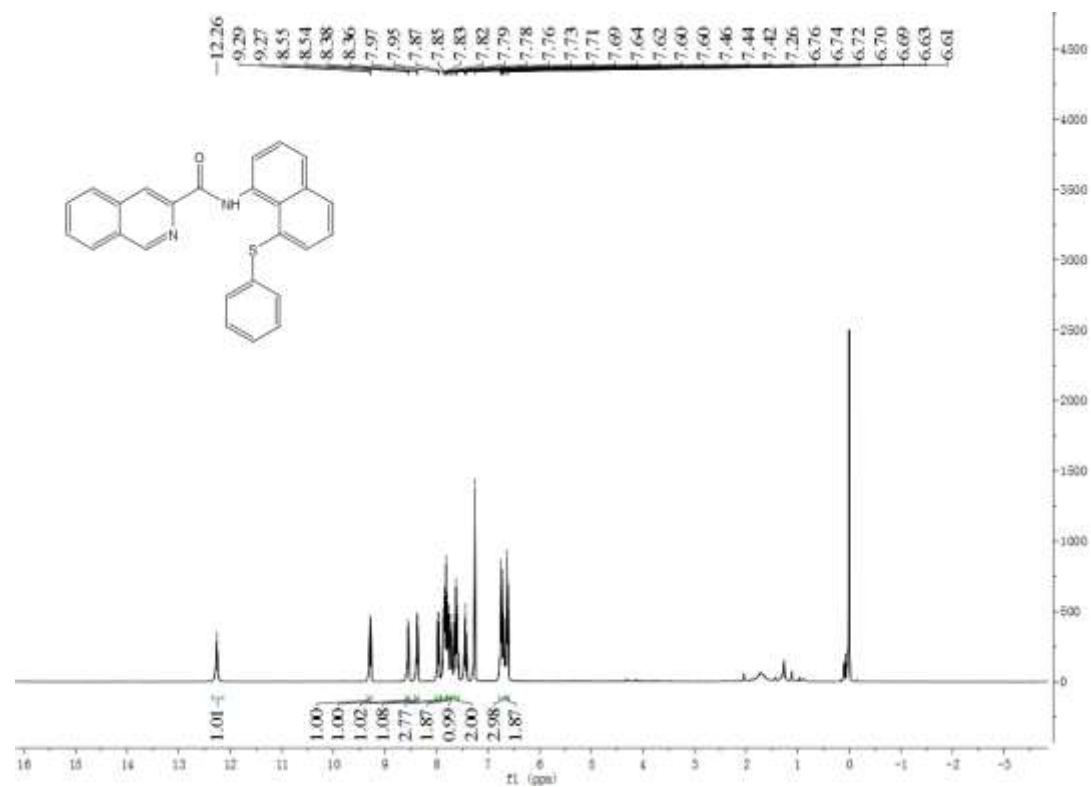

$^{13}\text{C}$  NMR of compound **3r** (in  $\text{CDCl}_3$ )

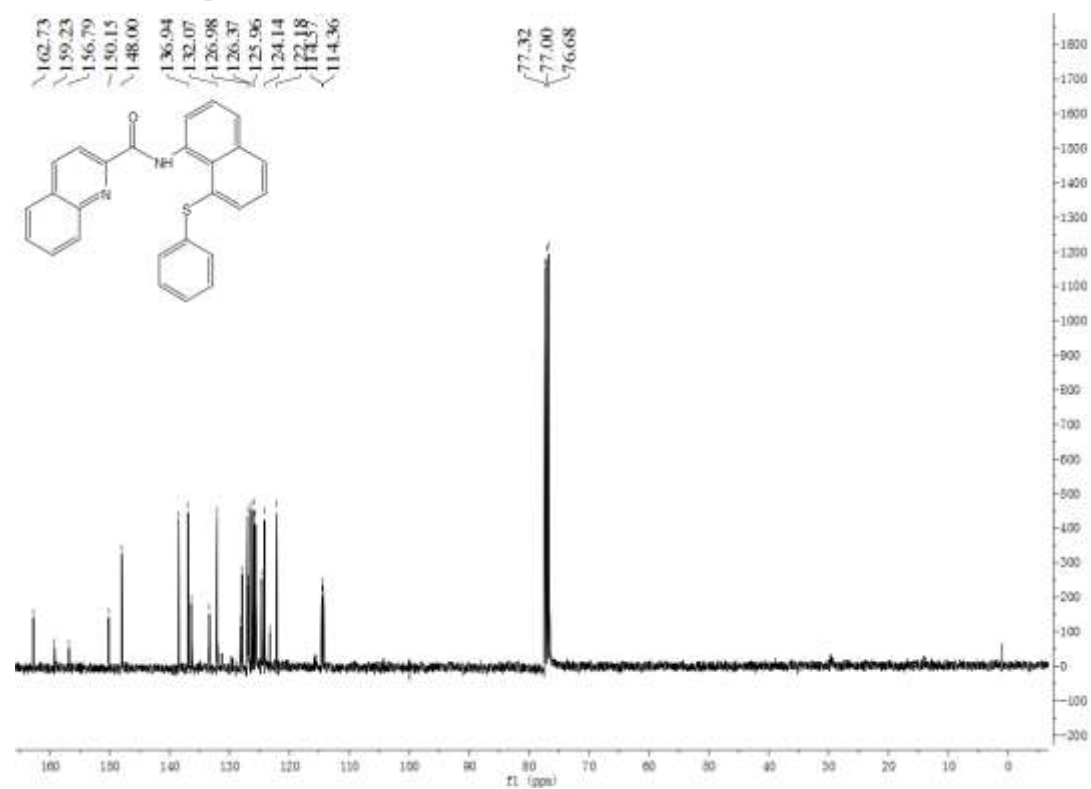

<sup>1</sup>H NMR of compound **3s** (in CDCl<sub>3</sub>)

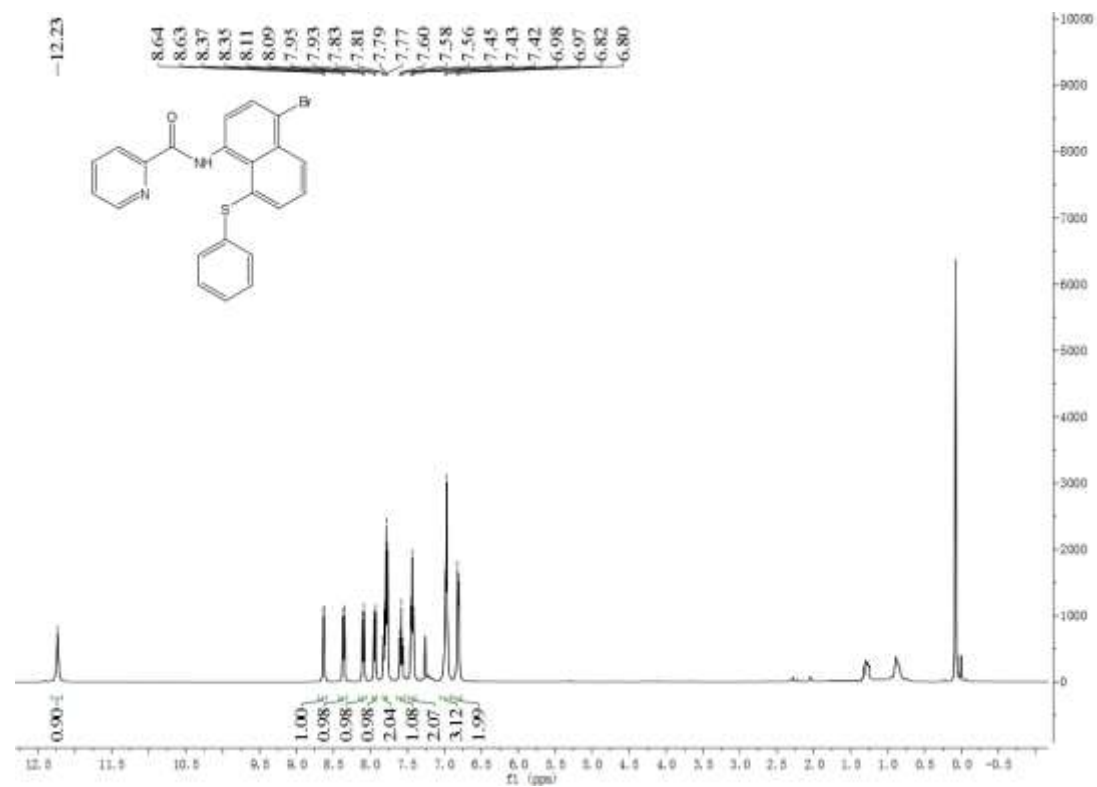

<sup>13</sup>C NMR of compound **3s** (in CDCl<sub>3</sub>)

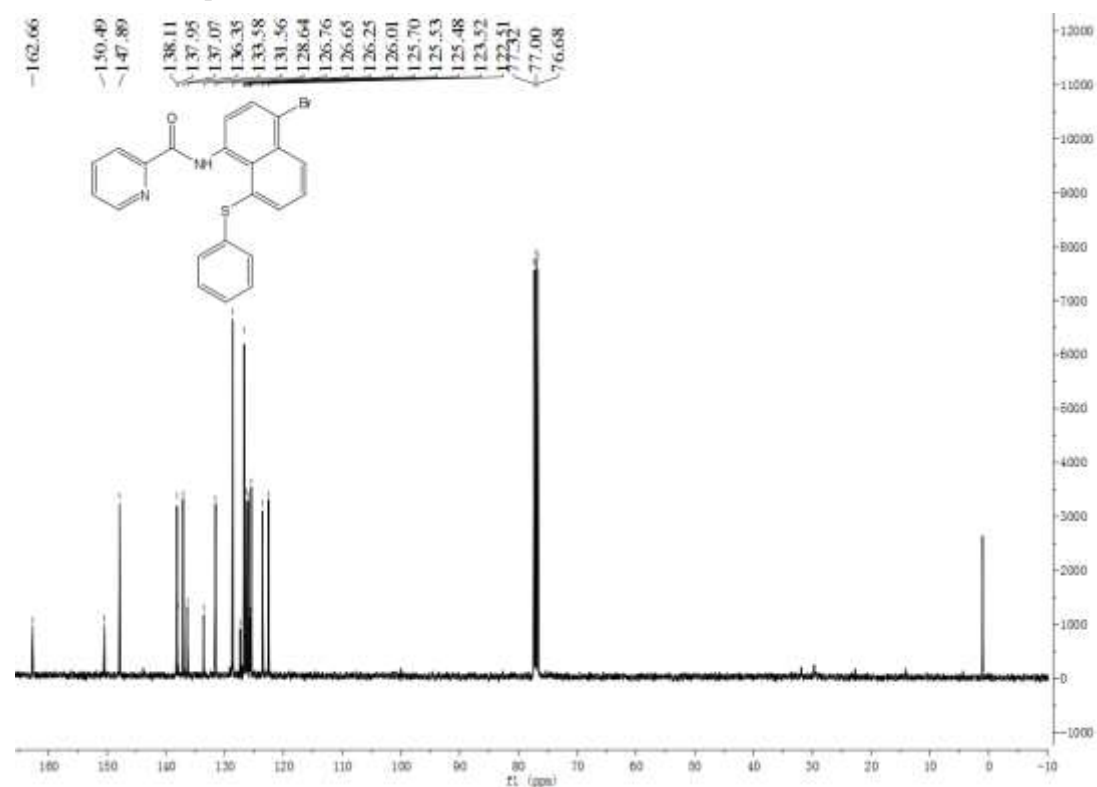

$^1\text{H}$  NMR of compound **4** (in  $\text{CDCl}_3$ )

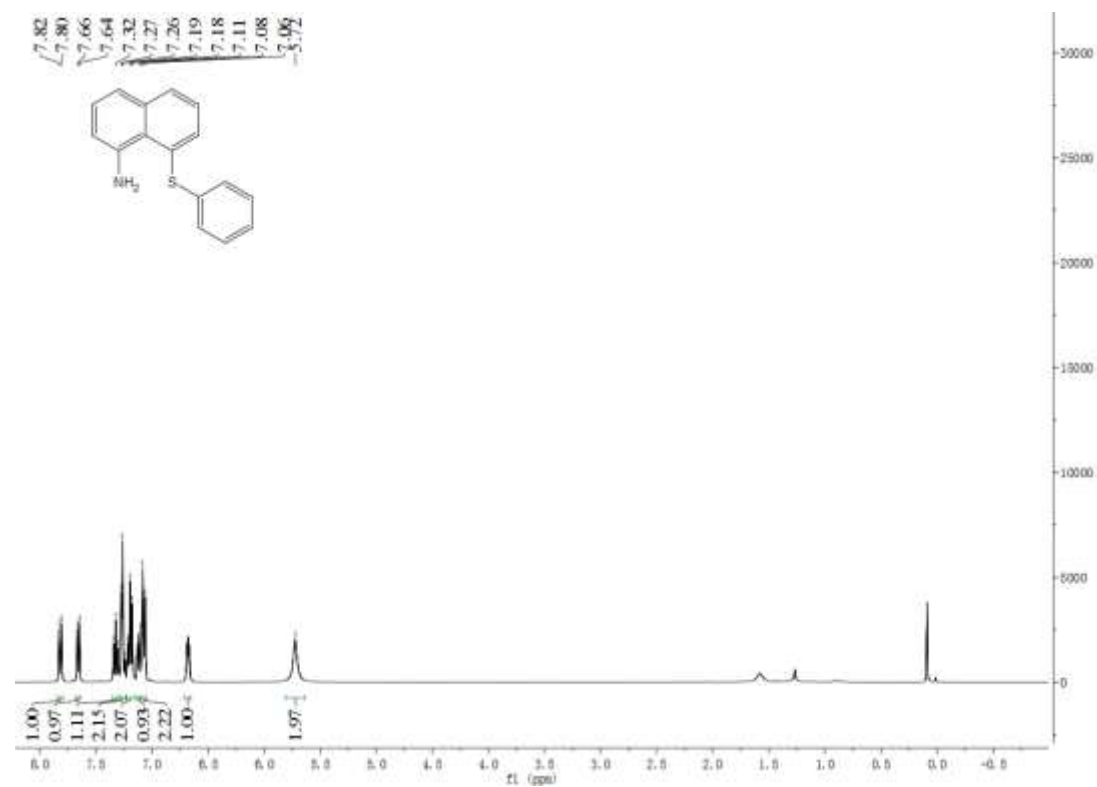

$^{13}\text{C}$  NMR of compound **4** (in  $\text{CDCl}_3$ )

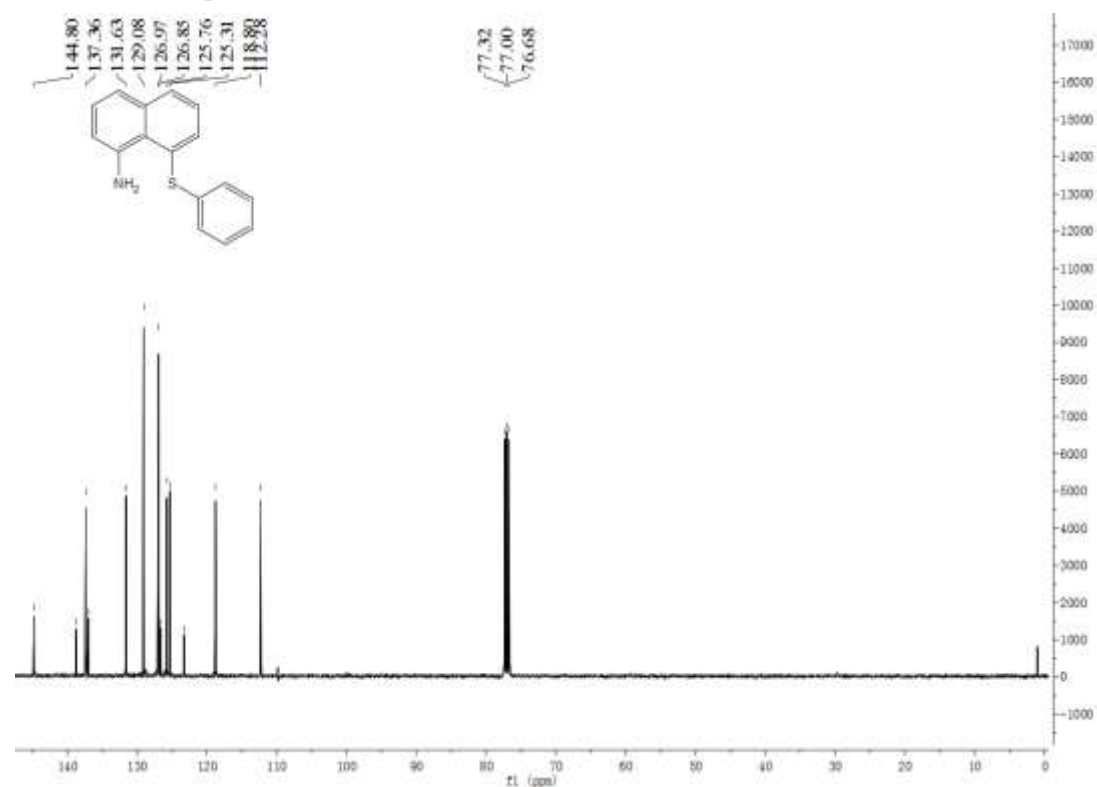



<sup>1</sup>H NMR of compound **5** (in CDCl<sub>3</sub>)

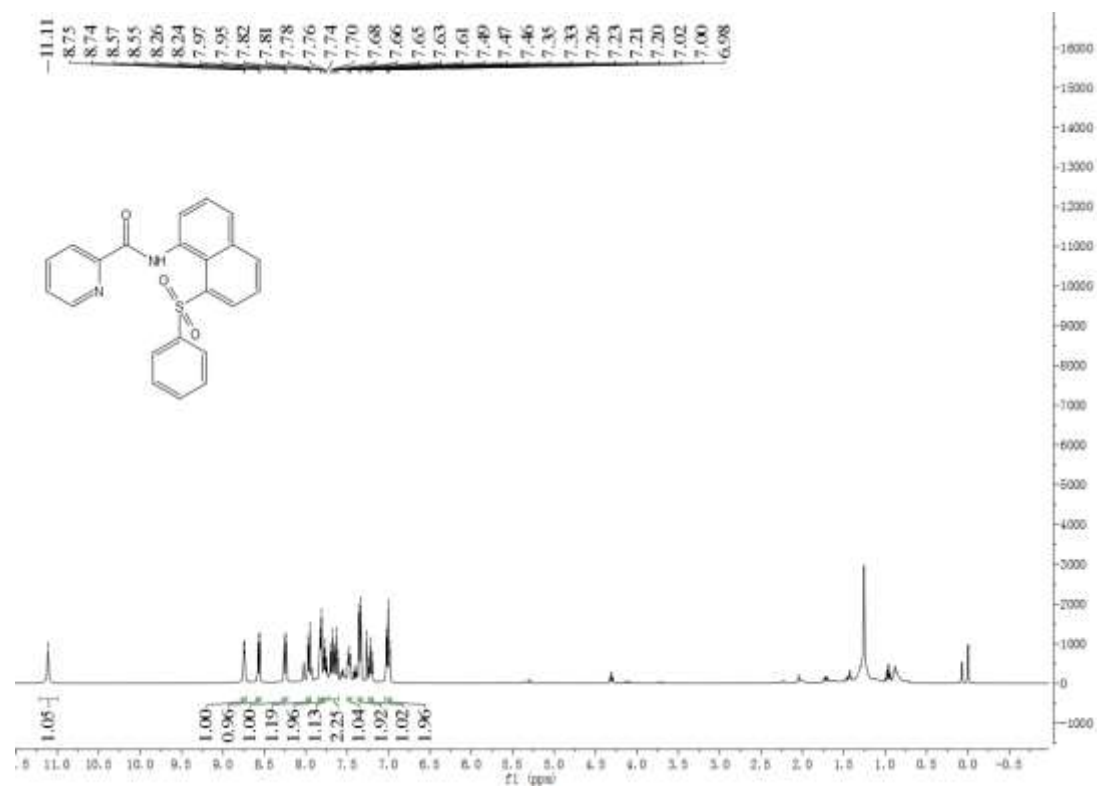

<sup>13</sup>C NMR of compound **5** (in CDCl<sub>3</sub>)

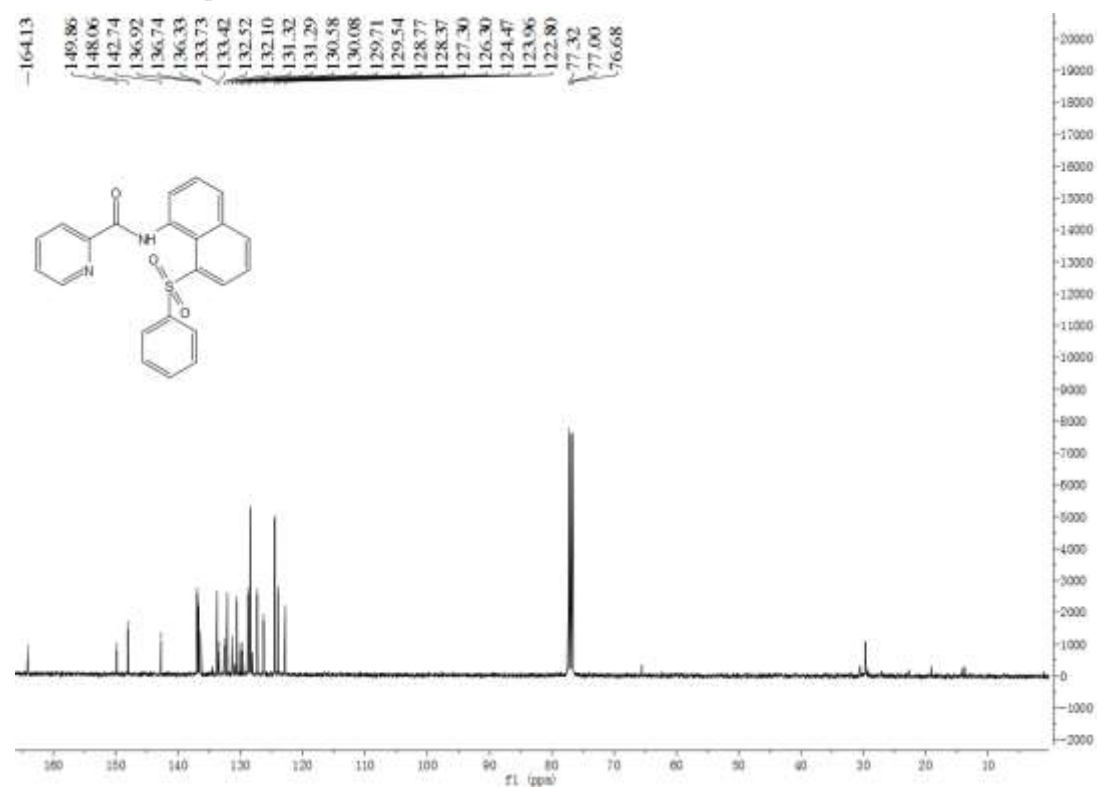

<sup>1</sup>H NMR of compound **1a-d** (in CDCl<sub>3</sub>)

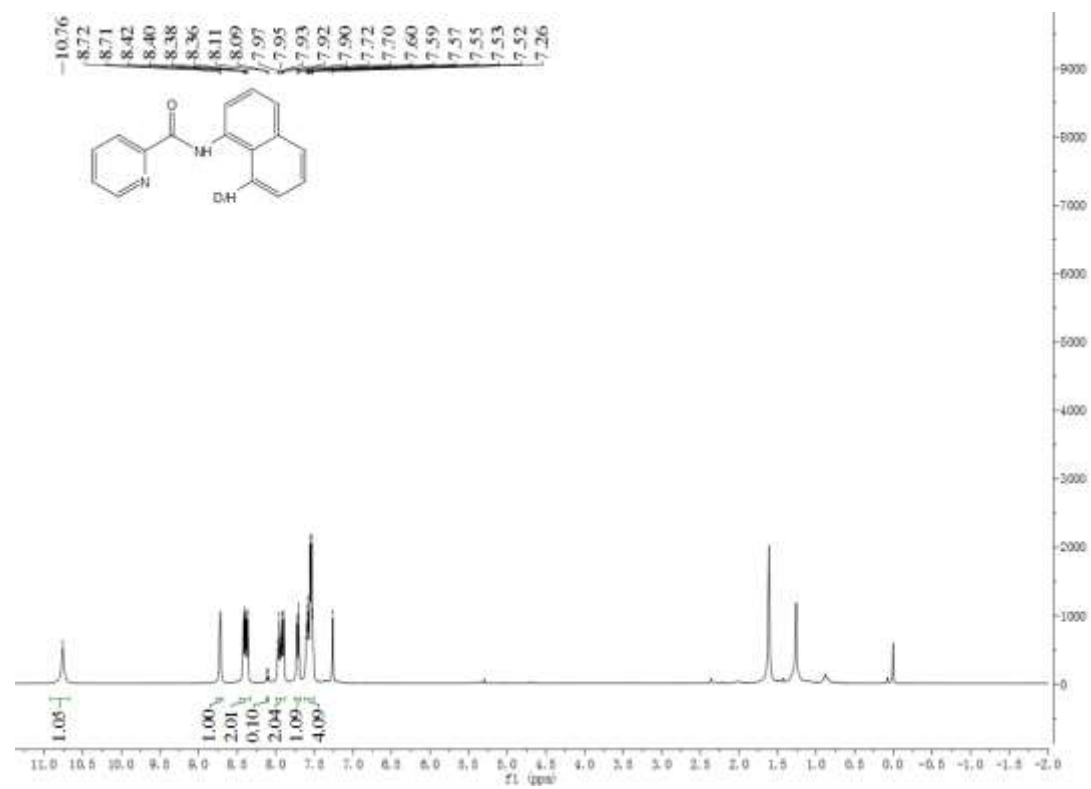

Supplement: c7qo01016h1.pdf [file c7qo01016h1.pdf]
